# Supplementary material for: A Markov Random Field Model for Network-based Differential Expression Analysis of Single-cell RNA-seq Data
Source: Research Square preprint supplement (doi:10.21203/rs.3.rs-116107/v1), 2020-12-03
Supplement: Supplementary file 1 [file 543e96ca7f07b4d1d7b632ee.xlsx]

## Sheet: no_MRF
B Cell	B Plasma	Dendritic_A	Dendritic_B	Dendritic_C	Dendritic_Langerhans	Dendritic_Plasmacytoid	Innate_lymphoid_A	Innate_lymphoid_B	Macrophage	Macrophage_Alveolar	Mast	Monocyte	Monocyte_Non_Classical	NK	T	T_Cytotoxic	T_Regulatory
ABCA1	BCL2	A2M	ATP2B4	ALCAM	FCGBP	ACACB	CRYBG1		A4GALT	A2M	BEX3	ABCA1	ABCA1	ABCA1	ABTB2	A2M	ACTB
ABHD3	BCL7A	ABCA1	BCL2A1	ARHGAP10	MYL9	CPM	HOPX		ABCA1	AASS	LTC4S	ABHD17C	ABHD17C	ACSL3	ACTB	ABLIM1	BATF
ACTB	CD22	ABCC4	CD83	BCAT1	NKG7	CXCR3			ABCG2	ABCA1		ABHD5	ABHD5	ACTB	AHNAK	ABTB2	CADM1
AFF3	CEP128	ABHD17C	CRIP1	BCL2A1	SCCPDH	FN1			ABHD5	ABCA6		ACOT7	ACKR3	ADAMTS17	AKAP6	ACTB	CALM3
AHNAK	EBF1	ACOT7	CRYBG1	BICDL1	SCGB3A1	GLUL			ABL1	ABCC4		ACSL3	ACTB	ADGRG5	ALOX5AP	ADAMTS17	CAMK4
AP1B1	HLA-DMB	ACSL3	FGD4	CCL18	SPP1	INSIG1			ABTB2	ABCG2		ACSL4	ADAM28	AHNAK	ANKRD26	ALOX5AP	CD177
APOC1	HLA-DPA1	ACTB	FN1	CD80		MSMO1			ACKR3	ABHD17C		ACTB	ADAMTS2	AK5	ANKRD28	ANK3	CD69
APOE	HLA-DPB1	ADAM28	HLA-DRB5	CD86		PPP1R16B			ACO1	ABHD5		ADAMTS2	ADCY9	ANKRD28	ANXA1	ANXA1	CD7
ARHGAP24	HLA-DRB1	ADGRE2	HSP90AA1	CHKA		RAB13			ACOT1	ABL1		ADCY3	ADGRE2	ANXA1	ANXA2	APBA2	EBI3
ATF7IP2	HLA-DRB5	AFF3	HSPA1A	CRYBG1		SCGB1A1			ACOX1	ACACB		ADCY9	ALDH1A2	APBA2	APBA2	APOC1	IL12RB2
AUTS2	HMGA1	AHNAK	NAMPT	CXCL8		SCGB3A1			ACP2	ACKR3		ALDH1A1	AMPD3	APOBEC3C	APOBEC3C	APOE	LAIR2
BIRC3	IRF8	ALCAM	PKP2	DENND5A		SPAG4			ACTB	ACOT1		AMPH	AMPH	APOC1	APOC1	AREG	LTB
BLK	ITPKB	AMPD3	S100A10	DNM1		SPP1			ACYP2	ACOT13		ANKH	ANKRD28	APOE	AREG	ARHGAP10	MB21D2
C1QA	MARCKSL1	ANK3	SCGB1A1	FGD4		SRGAP2B			ADAP1	ACOT7		ANKRD22	ANXA1	AREG	ARHGAP10	BCL11B	NAMPT
C1QB	MS4A1	ANKRD22	SCGB3A1	FN1		STOM			ADCY3	ACP2		ANKRD28	ANXA2	ATP1B3	ATF7IP2	BCL2L11	PCSK1N
C1QC	NAMPT	ANKRD28	SGMS2	GRAMD1B		TNFSF8			ADIPOR2	ACP5		ANXA1	APOBEC3C	ATP2B4	ATP1B3	BFSP2	PDE7B
CARMIL1	NFKBIA	ANXA1	SLC2A3	IL21R					ADTRP	ACSL4		APOBEC3A	ARSG	AUTS2	AUTS2	BTG2	SCGB1A1
CCL18	PAX5	ANXA2	VDR	IQCN					AGPAT4	ACTB		ARHGAP10	ATF6	BACH2	BAG3	C12orf75	SCGB3A1
CD63	PELI1	APOBEC3C	VIM	LGALS2					AGRP	ADAM17		ARSG	ATP1B3	BNC2	BATF	C1orf21	SPP1
CD70	RGS13	AQP3		MGLL					AHNAK	ADAM28		ATP1B3	BASP1	BTBD11	BCL11B	C1QA	TBC1D4
CD74	SCGB1A1	AREG		NFKB1					AHR	ADAMTS17		ATP2C1	BCL2A1	C1QA	BCL2L11	C1QB	THADA
CERS4	SCGB3A1	ARHGAP31		NHSL1					AKAP12	ADAMTS2		AUTS2	BCL2L11	C1QB	BRCA2	C1QC	TIAM1
CLIC4	TCL1A	ATP2B4		SCGB3A1					AKR1B1	ADGRE2		AVPI1	BSG	C1QC	BTG2	CAMK1D	TMSB4X
CMSS1	TMEM131L	ATP2C1		SERPINB9					AKR1C1	ADGRV1		AZI2	C1QA	CAMK1D	BUB1B	CARD11	TNFRSF13B
CNR1		AUTS2		SLC41A2					AKR1C2	ADIPOR2		BAIAP2	C1QB	CARD11	C12orf75	CBLB	TNFRSF18
CRYBG1		AVPI1		SRGAP2B					AKR1C3	AGPAT4		BASP1	C1QC	CBLB	C1QA	CCL18	VIM
CXCL8		AXL		ST6GAL1					ALDH1A2	AGPAT5		BCAS2	C5AR2	CCL18	C1QB	CCL3
DOCK4		BASP1		TBC1D4					ALDH2	AGRP		BCAT1	C9orf16	CCL20	C1QC	CCL5
DUSP4		BCAR3		TEX14					ALG13	AHNAK		BCL2A1	CCL18	CCL3	C9orf16	CD2
FABP4		BCL2A1		TRAF1					ALG9	AKAP12		BCL2L11	CCSER1	CCL5	CALM3	CD3D
FAM102A		BCL2L11		USP54					ALK	AKAP6		BLVRB	CD14	CD247	CAMK1D	CD3E
FCHSD2		BHLHE41		UVRAG					ALOX15B	AKR1B1		BMP6	CD163	CD3D	CAMK2D	CD3G
FN1		BIRC3		WDR74					ALOX5AP	AKR1C1		BORCS5	CD2AP	CD3G	CAPG	CD6
HERPUD1		BMP6		ZBTB16					AMIGO2	AKR1C2		BTBD11	CD300E	CD69	CARD11	CD69
HLA-DPA1		BNC2							ANK2	AKR1D1		C15orf48	CD74	CDK6	CASS4	CD7
HLA-DPB1		BRCA2							ANKRD22	ALCAM		C1QA	CD79B	CEBPD	CCDC30	CD70
HLA-DRA		BTBD11							ANKRD28	ALDH1A1		C1QB	CD86	CENPK	CCL18	CD74
HLA-DRB5		C10orf90							ANLN	ALDH1A2		C1QC	CDC42BPB	CEP78	CCL20	CD8A
HSP90AA1		C1QA							ANOS1	ALDH2		C5AR2	CEP128	CHIT1	CCL5	CHI3L1
IFI27		C1QB							ANXA1	ALK		C9	CFD	CHKA	CCSER1	CHIT1
IQCN		C5AR2							ANXA2	ALOX15B		CALM3	CHCHD10	CHN2	CD28	CHKA
IRF8		C9							AOC3	ALOX5AP		CBFA2T3	CITED2	CIR1	CD3D	CHN2
JADE3		CAMK1D							AP1B1	AMIGO2		CCDC30	CKB	CKS2	CD3E	CIR1
KLHL14		CARD11							APBB2	AMPD3		CCL18	CLEC4E	CLIC3	CD74	CKS2
LSAMP		CASS4							APIP	AMPH		CCND2	CLIC2	CNOT6L	CD83	CLNK
LTB		CAVIN2							APOBEC3C	ANGPTL4		CCSER1	CLIC4	COL6A2	CDC14A	CMC1
LY6E		CCL18							AQP3	ANK3		CD109	CMSS1	CRIP1	CEBPD	CMSS1
MALT1		CCL20							AR	ANKRD22		CD14	CRADD	CRYBG1	CEMIP2	CNOT6L
MAPRE2		CCL3							AREG	ANKRD28		CD300E	CRIP1	CST7	CERS6	CRIM1
MED12L		CCL4							ARHGAP10	ANOS1		CD63	CSF2RA	CXCL8	CHAF1A	CRIP1
MMP7		CCL4L2							ARHGAP31	ANXA1		CD74	CST3	CYP20A1	CHI3L1	CRYBG1
NAMPT		CD14							ARHGAP32	ANXA2		CD83	CSTB	DENND5A	CHIT1	CSGALNACT1
NFKB1		CD1A							ARHGEF28	APBB2		CD86	CTSB	DNAJB1	CHN2	CST7
NOP10		CD1B							ARMC8	APIP		CDCP1	CTTNBP2NL	DOCK11	CIR1	CTH
OSBPL3		CD1E							ARRDC4	APOBEC3C		CDH23	CXCL2	DOCK3	CITED2	CTSW
PAK1		CD207							ARSG	APOC1		CEMIP	CXCL8	DOCK4	CLEC2D	CXCL8
PALD1		CD36							ARSI	APOE		CFD	DAAM2	DUSP6	CLU	DDIT3
PELI1		CD74							ASF1B	AQP3		CHIT1	DBI	ECE1	CMTM8	DNAJA1
PLIN2		CD83							ASPM	ARAP2		CHN2	DDHD1	EFNA5	CNOT6L	DOCK11
POLB		CD84							ASTL	AREG		CHST15	DENND5A	EPAS1	COL1A2	DOCK4
PPBP		CD86							ATAD1	ARHGAP10		CIR1	DNAJB1	EPB41L5	CRIP1	DUSP16
PRSS3		CD9							ATAD2	ARHGAP24		CLCN3	DOCK4	ETS1	CRYBG1	DUSP4
RAB11FIP1		CDH20							ATP1B1	ARHGAP31		CLEC4E	DRAM1	EZH2	CSGALNACT1	EREG
RALA		CDH23							ATP1B3	ARHGAP32		CLIC2	DUSP6	FABP4	CTLA4	ETS1
RGS2		CDK1							ATP2B4	ARL4D		CLU	DUT	FARP2	CTSW	EZH2
RPS23		CHAF1A							ATP2C1	ARMC8		CMSS1	EEPD1	FCGR3A	CXCL8	FABP4
S100A8		CHIT1							ATP6V0D2	ARRDC4		COL23A1	EPB41L2	FGFBP2	CYP20A1	FAM102A
SCGB1A1		CHKA							AURKA	ASTL		CREB5	EPS8	FN1	DAPK2	FAM126A
SCGB3A1		CHN2							AURKB	ATAD1		CREG1	EREG	FOXO1	DBI	FAM160B1
SDK2		CIR1							AVPI1	ATF3		CRIP1	ERN1	FTL	DDIT3	FN1
SFTPC		CITED2							AXL	ATF6		CRISPLD2	EZH2	GADD45A	DDX58	FOXO1
SLC27A4		CLEC10A							AZI2	ATP1B3		CRYBG1	FAM117B	GAS7	DNAJB1	FTH1
SLC2A3		CLEC4F							B3GALNT2	ATP2B4		CSGALNACT1	FARP2	GFOD1	DOCK4	FTL
SPP1		CLIC4							BASP1	ATP2C1		CTH	FCAR	GNG2	DUSP16	G0S2
ST6GAL1		CPM							BCAR3	ATP6V0D2		CTSB	FCGR3A	GNLY	DUSP4	GALM
TCF4		CPVL							BCL2	AUTS2		CTSL	FCHO2	GPR141	EDARADD	GAPDH
TEX14		CRIP1							BCL2A1	AVPI1		CTSZ	FCN1	GZMB	EGR1	GLCCI1
THRB		CRIP2							BEX1	AZI2		CTTNBP2NL	FER	HIVEP1	EMP1	GOLIM4
TMEM131L		CRYBG1							BEX3	BAALC		CXCL2	FGD4	HIVEP2	ERO1B	GPR141
TMSB4X		CSF2RA							BICDL1	BACH2		CXCL8	FMN1	HLA-DPB1	ETS1	GPX3
TNFSF8		CST3							BIRC5	BAIAP2		CYTH3	FN1	HOPX	ETV7	GRN
TPD52		CST6							BLOC1S2	BASP1		DAAM2	FNDC3A	HSH2D	EZH2	GZMA
TPPP3		CSTB							BLVRB	BATF		DBT	FPR2	HSPA1A	FABP4	GZMB
TRAF3IP3		CTSZ							BORCS5	BCAR3		DDX60L	FTL	HSPA5	FAM102A	HERC5
TTC28		CXCL2							BRAT1	BCAT1		DENND5A	G0S2	HSPB1	FAM214A	HIP1
TXN		CXCL8							BRCA2	BCL2		DNAJA1	GBP1	HSPD1	FARP2	HIVEP1
USP6NL		CYTH3							BRI3	BCL2A1		DNASE2	GBP5	HSPH1	FN1	HLA-DPA1
WDFY4		DAPP1							BUB1B	BCL2L11		DOCK4	GK	IER2	FOXO1	HLA-DPB1
XYLT1		DBI							C10orf90	BCR		DUSP4	GLIS3	IFI27	GALM	HSP90AA1
YWHAH		DDHD1							C15orf48	BEX1		EEPD1	GNG2	IGF1R	GAPDH	HSPA5
ZBTB16		DDIT3							C1QA	BIRC3		EIF2AK3	HBEGF	IGF2BP2	GBP5	IFI27
ZNF331		DENND5A							C1QC	BIRC5		EPN2	HCK	IGLL5	GNG2	IFIT2
		DNAJA1							C8B	BIRC7		EPS8	HIP1	IKZF3	GZMA	IGLL5
		DOCK4							C9orf16	BLOC1S2		EREG	HIVEP1	IL12RB2	HERC5	IL12RB2
		DRAM1							CABLES1	BLVRB		ERN1	HIVEP2	IL1R2	HERPUD1	IL1R2
		DUSP16							CADM1	BMP6		ERRFI1	HLA-DPA1	IL32	HIP1	IL32
		DUSP4							CADPS2	BNC2		F13A1	HLA-DPB1	JUN	HIVEP1	INPP5A
		EBI3							CALM3	BRI3		FABP4	HLA-DQA1	KLF12	HIVEP2	IQCN
		EEPD1							CAMK1D	BSG		FABP5	HLA-DQB1	KLRC1	HLA-DPA1	IRAK2
		EGR2							CAMK2D	BTBD11		FAM20C	HLA-DRA	KLRG1	HLA-DQB1	ISG15
		EMP1							CAMP	BTG2		FAM214A	HLA-DRB1	LAIR2	HLA-DRA	ITM2C
		ENTPD7							CARD11	C10orf90		FCAR	HS3ST3B1	LAPTM4B	HLA-DRB1	JCHAIN
		EREG							CASS4	C16orf54		FCGR3A	ID2	LDLR	HOPX	JUN
		EZH2							CAVIN3	C16orf74		FCN1	IFITM2	LDLRAD4	HSP90AA1	KLF12
		FABP5							CBLB	C1QB		FER	IGF1R	LGALS1	HSPA5	KLRG1
		FAM160A1							CCDC138	C1QC		FGD4	IL10	LRIG1	HSPB1	LAIR2
		FBP1							CCDC18	C1QTNF1		FGF18	IL15	LSAMP	HSPG2	LDLRAD4
		FCER1A							CCDC36	C2		FGFR1	IL18R1	LSP1	IFI27	LGALS1
		FCGBP							CCDC83	C5AR2		FLT1	IL1B	MAPRE2	IFNG	LRIG1
		FCN1							CCDC88A	C9		FLVCR2	IL1R1	MFSD14B	IGLL5	LSAMP
		FGD2							CCL13	C9orf16		FMN1	IL1R2	MMP7	IKZF3	LSP1
		FGF18							CCL18	CA12		FMNL2	INPP5A	MPP6	IL12RB2	MAPRE2
		FGL2							CCL20	CA2		FN1	IRAK2	MSR1	IL1R2	MARCKSL1
		FLT3							CCL21	CABLES1		FNDC3A	ITGB8	MTSS1	IL21R	MCTP2
		FMN1							CCL23	CADPS2		FNIP2	ITPKB	MYO1D	IL32	MLKL
		FMNL2							CCL4	CALM3		FOLR3	JARID2	NAMPT	IRAK2	MMP7
		FN1							CCL4L2	CAMK1D		FOXK2	JUN	NCALD	ITK	MPP6
		FNIP2							CCL7	CAPG		FOXO1	KCNMA1	NFATC2	ITM2A	MT2A
		FRY							CCNA2	CARD11		FPR2	KYNU	NFKB1	JAML	MYO1D
		G0S2							CCNB1	CARMIL1		FRMD4A	LGALS1	NFKBIA	JMY	NAMPT
		GADD45B							CCSER1	CASS4		FTL	LILRB4	NKG7	LDHB	NCAM1
		GCLM							CD22	CAVIN2		G0S2	LRCH1	NUPR1	LDLR	NFATC2
		GFOD1							CD274	CAVIN3		GAS7	LSP1	OFD1	LDLRAD4	NFKB1
		GLUD1							CD2AP	CBLB		GBP1	LTA4H	PAK1	LEF1	NFKBIA
		GLUL							CD300E	CCDC181		GK	LY6E	PAM	LGALS1	NKG7
		GNG2							CD36	CCDC30		GLDC	MAFB	PDE4D	LMNA	NUPR1
		GNG7							CD59	CCDC36		GLRX	MALT1	PFKFB3	LRIG1	OASL
		GPAT3							CD63	CCDC88A		GLT1D1	MAML3	PLIN2	LSAMP	OSM
		GRAMD2B							CD74	CCL13		GNG4	MAP4K4	POLB	LSP1	PARP8
		GSN							CD80	CCL18		GPAT3	MARCKSL1	PON2	LTB	PCNA
		HCK							CD9	CCL2		GPR137B	MB21D2	PPBP	LTC4S	PDE3B
		HES4							CDA	CCL20		GPRC5A	MCTP2	PPP1R13B	MANF	PHLDA1
		HIP1							CDC20	CCL22		GRN	MERTK	PPP1R16B	MAPRE2	PIM2
		HIVEP1							CDCA3	CCL23		HELB	MET	PRDM1	MB21D2	PLCG2
		HIVEP2							CDCA8	CCL4		HES4	MOB3B	PRF1	MCTP2	PLIN2
		HK2							CDCP1	CCL4L2		HEY1	MSR1	PRKX	MED12L	PLPP1
		HLA-DMB							CDH23	CCL5		HIP1	MT2A	RAP1GAP2	MFHAS1	POLE2
		HLA-DPA1							CDK1	CCL7		HIVEP1	NAMPT	RHOB	MMP7	PPBP
		HLA-DPB1							CDKN2C	CCNB2		HK2	NAV1	RHOC	MT2A	PPP1R13B
		HLA-DQA1							CDKN3	CCND1		HLA-DMB	NCF1	RHOH	MYL6B	PRKX
		HLA-DQB1							CEACAM8	CCSER1		HLA-DPA1	NEBL	RIPOR2	MYLIP	PTPRM
		HLA-DQB2							CENPA	CD14		HLA-DPB1	NFAM1	S100A8	NAMPT	RAB7A
		HLA-DRA							CENPE	CD163		HLA-DQA1	NFKB1	S100A9	NFKBIA	RALA
		HLA-DRB1							CENPF	CD1A		HLA-DQB1	NOP10	SCGB1A1	NLRP3	RHOH
		HLA-DRB5							CENPM	CD1B		HLA-DRA	NR4A3	SCGB3A1	NUPR1	RIPOR2
		HMGA1							CENPO	CD1E		HLA-DRB1	OAS1	SERPINB9	OASL	RPS23
		HS3ST3B1							CENPU	CD28		HLA-DRB5	OSBPL8	SERPING1	PAG1	RRAS2
		HSP90AA1							CENPW	CD300E		HMGB2	P2RY8	SFTPA1	PDE3B	S100A10
		HSP90B1							CEP128	CD36		HMOX1	PAK1	SFTPC	PDE4D	S100A8
		HSPA1A							CEP44	CD3D		HSP90AA1	PAM	SKAP1	PDE7B	S100A9
		HSPG2							CEP55	CD59		HSP90B1	PAPSS2	SLC27A4	PELI1	SAMD3
		IER3							CERS6	CD63		HSPA1A	PARP8	SLC2A3	PHTF1	SCGB1A1
		IFI44L							CFAP161	CD69		HSPD1	PCSK5	SMAD3	PLCG2	SCGB3A1
		IFITM2							CFD	CD7		HSPG2	PDE3B	SOD2	PLIN2	SDF2L1
		IFITM3							CHDH	CD74		HSPH1	PDE4D	SPON2	PLPP1	SERPING1
		IFNLR1							CHI3L1	CD83		HTRA1	PDK1	SPP1	PON2	SERPINH1
		IL10							CHIT1	CD84		ID2	PELI1	TC2N	PPBP	SFTPA1
		IL18R1							CHN2	CD9		ID3	PFKFB3	TEX14	PPP1R16B	SFTPA2
		IL1B							CHRM3	CDA		IDH1	PID1	TFDP2	PPP2R2B	SFTPC
		IL1R2							CHSY1	CDC14A		IER2	PLAC8	THBS1	PRKCA	SGCD
		IL1RL1							CIR1	CDC20		IFI44L	PLCG2	TMSB4X	PSTPIP2	SLC12A2
		INPP5F							CIT	CDC42BPB		IGSF6	PLEK	TNF	RAPGEF5	SLC27A4
		IRAK2							CKAP2L	CDCP1		IL10	PLXNC1	TPST1	RASAL2	SLC2A1
		IRF8							CKS2	CDH23		IL18R1	PPARG	TRAF3IP3	RCAN2	SLC2A3
		ITGB8							CLCN3	CDK6		IL1RAP	PPP1R16B	TRERF1	RETREG1	SNX9
		JARID2							CLDN12	CDKN2A		INPP5A	PSTPIP2	TXK	RGPD1	SORBS1
		KCNE1							CLEC11A	CDKN3		INSIG1	PTP4A3	UAP1	RIPOR2	SPOCK2
		KCNIP1							CLEC17A	CEBPD		IQCN	RAB11FIP1	VIM	RNF122	SPON2
		KYNU							CLEC5A	CEMIP		ITPKB	RALA	VIPR2	RPS23	SPP1
		LDLRAD4							CLIC2	CENPM		JARID2	RANBP2	WDR74	RRAS2	STMN1
		LGALS1							CLIC4	CENPP		KCNE1	RDX	WWOX	S100A10	STRBP
		LGALS2							CLIP2	CENPU		KCNMA1	RFTN1	XCL1	S100A11	STX3
		LMNA							CLSPN	CENPW		KDM2B	RFX2	XCL2	S100A8	SYAP1
		LPL							CMC1	CEP128		KLRG1	RGL1	YES1	S100A9	SYTL3
		LSP1							CMSS1	CERS4		LDLR	RGPD1	ZBTB16	SAMD3	TAF4B
		LTB							COL1A1	CERS6		LGALS2	RHOB	ZEB1	SCGB1A1	TC2N
		LTC4S							COL1A2	CFAP161		LGMN	RHOC		SCGB3A1	TCOF1
		LY6E							COL4A2	CFD		LILRB4	RIN2		SERPING1	TCTN3
		LYPD3							COLEC12	CHCHD10		LMNA	RIPOR2		SFMBT1	TESK2
		LYZ							COMT	CHCHD6		LRMP	RNF19B		SFTPA1	TEX14
		MALT1							CORO2A	CHI3L1		LRRK2	RPS23		SFTPC	THEMIS
		MAP4K4							CPE	CHIT1		LSAMP	RRP12		SH3RF3	TMEM184C
		MAPRE2							CPM	CHKA		LSP1	RUBCN		SIPA1L3	TMSB4X
		MARCKSL1							CPVL	CHN2		LY6E	S100A10		SKAP1	TNFRSF9
		MATK							CRADD	CHRM3		LYVE1	S100A11		SLC27A4	TPPP3
		MB21D2							CREG1	CHST15		LYZ	SASH1		SLC2A1	TPST1
		MGST1							CRIM1	CHSY1		MALT1	SCGB1A1		SLC2A3	TRAF3IP3
		MIS18BP1							CRIP1	CIR1		MAP4K4	SCGB3A1		SNTB1	TRERF1
		MKI67							CRIP2	CITED2		MB21D2	SDC2		SNX9	UAP1
		MOB3B							CRYBG1	CKS1B		ME1	SERPINA1		SPARC	UBTD2
		MRC1							CSF2RA	CLCN3		MEF2C	SGMS2		SPP1	USP37
		MRPS6							CST3	CLEC10A		MERTK	SGPP1		SRGAP2B	WDR74
		MSR1							CSTB	CLEC11A		MET	SH3PXD2B		SSBP3	WWOX
		MT1E							CTAG2	CLEC1A		MMP7	SH3RF3		STMN1	XCL1
		MT2A							CTH	CLEC4E		MN1	SIPA1L3		STOM	XCL2
		NARS2							CTNNAL1	CLEC5A		MOB3B	SLAMF7		STRBP	YWHAH
		NEK1							CTSB	CLIP2		MRC1	SLC10A1		STX3	ZEB1
		NET1							CTSG	CLU		MS4A4A	SLC16A10		SYTL2	ZFX
		NFE2L3							CTSK	CMC1		MSMO1	SMAD3		SYTL3	ZNF10
		NFKB1							CTSW	CMSS1		MSR1	SMPDL3A		TANC2
		NFKBIA							CXADR	CMTM8		MT1X	SNTB1		TBC1D4
		NFKBID							CXCL5	CNOT6L		MT2A	SNX9		TBC1D8
		NHSL1							CXCL8	COL19A1		MTSS1	SOD2		TBCEL
		NKG7							CYP20A1	COL1A1		MYL6B	SPOCK1		TC2N
		NLRP3							CYP27A1	COL1A2		MYOF	SPP1		TCTN3
		NPHP4							CYTH3	COL23A1		NARS2	SRGAP2B		THBS1
		OAS1							DBI	COL4A2		NCALD	SSBP3		TIAM1
		OSBPL3							DBT	COL6A1		NEBL	STARD13		TIMP1
		OSBPL8							DCN	COL6A2		NEDD9	STAT4		TMEM131L
		OSM							DDHD1	COLEC12		NEK1	STK38L		TMSB4X
		OTUD1							DDIT3	COMT		NFAM1	STXBP2		TNFSF8
		PADI2							DDX58	CPM		NFKB1	SULF2		TOB1
		PAG1							DDX60L	CPVL		NFKBIA	SYAP1		TOX2
		PALD1							DEFB1	CRABP2		NKG7	SYTL3		TPPP3
		PAPOLG							DENND5A	CRADD		NLRP3	TANC2		TRAF3IP3
		PC							DEPP1	CREB5		NR4A3	TCF4		TSHZ2
		PDE3B							DHRS3	CRIP1		NRP1	TENT4B		TSPO
		PDK4							DHX34	CRIP2		NUPR1	THBS1		TTC39B
		PDLIM4							DIXDC1	CRYBG1		OTUD1	TMSB4X		TXK
		PEBP1							DLC1	CRYM		PAK1	TNFAIP6		UBASH3B
		PID1							DNAH2	CSF1		PAPSS2	TNFRSF21		UBTD2
		PIM2							DNAJA1	CSF2		PARP16	TNNT1		USP37
		PKP2							DNAJB1	CSF2RA		PC	TOB1		VIM
		PLEK							DNAJB4	CSGALNACT1		PCBP3	TPPP3		WDR59
		PLEKHA5							DNAJC5B	CST3		PDE3B	TPST1		YWHAH
		PLIN2							DOCK11	CST6		PDE4D	TRAF1		ZBTB16
		PLXNC1							DOCK3	CSTA		PELI1	TREM1		ZBTB44
		PMAIP1							DOCK4	CSTB		PHLDA1	TSPO		ZC3HAV1
		POLE2							DPYS	CTH		PHLDA2	TTYH2		ZEB1
		PON2							DRAM1	CTSA		PLAC8	UGCG		ZFX
		PPBP							DST	CTSB		PLCB1	USP36		ZNRF1
		PPP1R16B							DTNA	CTSC		PLD3	USP37
		PRDM1							DUSP16	CTSG		PLEK	USP6NL
		PRKAR2B							DUSP4	CTSK		PLEKHA5	UST
		PTGS2							DUSP6	CTSW		PLEKHG1	UVRAG
		PTMS							DUT	CTSZ		POLB	VAMP5
		PTTG1							EDA	CTTN		POLDIP3	VAV2
		RAB11FIP1							EEPD1	CTTNBP2NL		PPARG	VDR
		RALA							EGR1	CXCL1		PPBP	VIM
		RFX2							EGR2	CXCL13		PRDM1	VSIG4
		RGS13							EIF2AK3	CXCL2		PSAP	WDR74
		RHOH							ELOVL7	CXCL5		RAB13	XYLT1
		RIN2							EMP1	CXCL8		RAB7A	YBX1
		RNASE2							ENPP3	CXCL9		RALA	ZBTB16
		RNF19B							EPAS1	CYP1B1		RANBP2	ZC3H12C
		RRP12							EPB41L1	CYP20A1		RAPH1	ZNF331
		RTN1							EPB41L4A	CYP27A1		RFTN1
		RUBCNL							EPB41L5	CYP7B1		RFX2
		RUNX2							EPN2	CYSLTR2		RGPD1
		RUNX3							EPSTI1	DAAM2		RHOB
		S100A10							EREG	DAB2		RHOH
		S100A11							ERO1B	DACH1		RIPOR2
		S100A8							ERRFI1	DBF4B		RNASE1
		S100A9							ETV3	DBI		RNASE2
		S100B							EXT1	DCN		RNF175
		SCGB1A1							EZH2	DDX58		RPS23
		SCGB3A1							FABP3	DDX60L		RRP12
		SDC4							FABP5	DEFB1		RUBCN
		SDF2L1							FADS1	DENND4C		S100A10
		SEMA4A							FADS2	DENND5A		S100A9
		SERPINB9							FAM13A	DEPP1		SASH1
		SFTPA1							FAM168A	DGKH		SCGB1A1
		SFTPA2							FAM3B	DHRS3		SCGB3A1
		SFTPC							FAM89A	DHRS9		SDC2
		SGK1							FARP1	DHX34		SECTM1
		SGMS2							FARP2	DIP2C		SERPINA1
		SH3BP4							FBN1	DNAAF1		SERPINB5
		SH3PXD2B							FBP1	DNAH5		SERPINB9
		SH3RF3							FBXL2	DNAH6		SERPING1
		SIPA1L3							FCGR1A	DNAJA1		SFTPA1
		SLC19A2							FCGR2B	DNAJA4		SFTPA2
		SLC1A3							FCGR3A	DNAJB1		SFTPC
		SLC27A4							FCHSD2	DNAJC5B		SGIP1
		SLC2A3							FCN1	DNASE2B		SGK1
		SLC7A11							FDX1	DNM1		SGMS2
		SMAD3							FER	DOCK11		SIGLEC10
		SNAP23							FGD2	DOCK4		SIPA1L3
		SOD2							FGD4	DOK7		SLAMF1
		SPP1							FGD5	DOP1B		SLC16A10
		SQSTM1							FGF10	DRAM1		SLC16A6
		SRGAP2B							FGF18	DST		SLC1A3
		ST6GAL1							FGFR1	DTNA		SLC25A37
		STAT4							FHIT	DTYMK		SLC27A4
		STK38L							FHL1	DUSP16		SLC2A3
		STRBP							FLNB	DUSP4		SLC7A11
		SYNJ2							FMNL2	DUSP6		SLC7A8
		TACSTD2							FN1	DUT		SMAD3
		TBC1D9							FNDC3A	DYSF		SMOX
		TCF4							FNIP2	EBF1		SNAPC1
		TGFBI							FOLR1	EBI3		SOD2
		THBS1							FOLR3	ECE1		SPP1
		TIMP1							FOXK2	EDA		SPRY1
		TMEM52B							FOXO1	EEPD1		SPSB1
		TMSB4X							FPR2	EGLN1		SQSTM1
		TNFSF8							FRMD4A	EGR1		SRGAP2B
		TOP2A							FTL	EGR2		SSBP2
		TPPP3							FUCA1	EIF2AK3		SSBP3
		TPST1							FXR2	ELANE		ST6GALNAC3
		TRAF1							FYN	ELOVL7		STARD13
		TREM1							G0S2	EMP1		STAT4
		TSPAN15							GADD45A	EMP2		STK38L
		TSPO							GADD45B	ENPP2		STX3
		UAP1							GALM	EPB41L1		STXBP2
		UGCG							GAPDH	EPB41L5		SULF2
		USP37							GAS7	EPHB1		SVIL
		UST							GATA3	EPS8		SYAP1
		VDR							GBE1	EPSTI1		SYTL3
		VIM							GBP1	EREG		TBC1D2
		WDR59							GBP5	ERO1B		TBC1D8
		WDR74							GCH1	ERRFI1		TCF4
		YBX1							GCLM	ESR2		TCF7L2
		YWHAH							GCNT2	ETV3		TENT4B
		ZBTB16							GDF11	EVL		TEX14
		ZC3H12C							GDF15	EXT1		TFPI
		ZFYVE16							GEM	EZH2		TFRC
		ZNF704							GGH	F11		TIAM1
		ZNRF1							GIPC1	F13A1		TMSB4X
									GK	F3		TNFRSF10D
									GLIS3	FABP3		TNFRSF21
									GLT1D1	FABP4		TNFSF8
									GLUD1	FABP5		TNNT1
									GLUL	FAIM		TPPP3
									GM2A	FAM110B		TPST1
									GNG11	FAM117B		TREM1
									GOLM1	FAM126A		TSPYL2
									GPA33	FAM13A		TTYH2
									GPAT3	FAM160A1		TUBA1A
									GPC4	FAM168A		TUBB
									GPC5	FAM20C		TWISTNB
									GPC6	FAM3B		USP36
									GPR137B	FAM89A		USP37
									GPX3	FBP1		USP6NL
									GRIP2	FBXO45		UST
									GRK5	FCAR		UVRAG
									GRN	FCER1A		VAMP5
									GSTO2	FCER2		VAV2
									GTF2IRD1	FCGR1A		VCAN
									GTSE1	FCGR2B		VSIG4
									GYS1	FCGR3A		WDR59
									HAUS6	FCHO1		WDR74
									HBEGF	FCHO2		XYLT1
									HECTD1	FCHSD2		ZBTB16
									HERPUD1	FCN1		ZC3H12C
									HES4	FDFT1		ZFYVE16
									HEY1	FDX1		ZNF331
									HIVEP1	FER		ZNRF1
									HIVEP2	FGD2
									HLA-DMB	FGD4
									HLA-DPA1	FGD5
									HLA-DPB1	FGF18
									HLA-DQB2	FGL2
									HLA-DRA	FHIT
									HLA-DRB1	FILIP1L
									HMG20B	FLNB
									HMGA1	FLT1
									HMGB2	FLT3
									HMGB3	FLVCR2
									HMGCS1	FMN1
									HMGN2	FMNL2
									HMMR	FN1
									HMOX1	FNDC3A
									HNF1A	FNIP2
									HOMER1	FOLR1
									HOMER2	FOLR3
									HOXA3	FOXK2
									HP	FOXO1
									HPGDS	FRMD4A
									HRH1	FRY
									HS3ST3B1	FSTL3
									HSD11B1	FTH1
									HSP90AA1	FTL
									HSP90B1	FYN
									HSPA1A	G0S2
									HSPB1	GADD45A
									HSPD1	GADD45B
									HSPH1	GAL
									HTRA4	GALM
									ICA1	GAPDH
									ICOS	GART
									ID2	GAS2L3
									ID3	GAS7
									IDH1	GBP1
									IDO1	GBP3
									IER2	GBP5
									IFI27	GCH1
									IFI44L	GCHFR
									IFITM2	GCLC
									IFITM3	GCLM
									IFNLR1	GCNT2
									IFRD1	GDF11
									IGFBP2	GDF15
									IGFBP6	GEM
									IGLL5	GFOD1
									IGSF6	GGH
									IL12RB1	GINS2
									IL15	GIPC1
									IL17RB	GJB2
									IL18R1	GLDC
									IL1R2	GLIS3
									IL1RN	GLUD1
									IL6	GLUL
									IL7R	GM2A
									INPP5A	GNG2
									INSIG1	GNG4
									IQCN	GNG7
									IQGAP3	GOLM1
									IRAK2	GPAT3
									IRF8	GPC4
									ITGAD	GPC5
									ITGB5	GPC6
									JAKMIP2	GPD1
									JAML	GPR183
									JARID2	GPX3
									JCHAIN	GRAMD1B
									JMY	GRAMD2B
									JUN	GRB10
									KANK1	GRN
									KAZN	GSN
									KCNA2	GZMA
									KCNAB1	GZMB
									KCNE1	HAMP
									KCNJ2	HAUS2
									KCNMA1	HBB
									KDM2B	HCK
									KIF14	HDAC9
									KIF16B	HEATR5B
									KLHDC8B	HECTD1
									KLHL15	HERC5
									KLHL25	HERPUD1
									KLHL29	HES1
									KLRG1	HES4
									KYNU	HEXB
									LAMB1	HEY1
									LARGE1	HIP1
									LDLR	HIVEP1
									LDLRAD4	HIVEP2
									LGALS1	HLA-DMB
									LGALS3	HLA-DPA1
									LGALS3BP	HLA-DPB1
									LGMN	HLA-DQA1
									LGR4	HLA-DQB1
									LILRB4	HLA-DQB2
									LIMA1	HLA-DRA
									LINGO2	HLA-DRB1
									LMNA	HLA-DRB5
									LONRF3	HMG20B
									LPAR1	HMGA1
									LPAR3	HMGB2
									LPL	HMGCS1
									LRIG1	HMGN2
									LSAMP	HMOX1
									LSP1	HOXA3
									LTA4H	HP
									LYPD3	HPGDS
									LYZ	HRH1
									MACC1	HRK
									MAD2L1	HS3ST2
									MAEL	HS3ST3B1
									MAFB	HSD11B1
									MALT1	HSD3B7
									MAML3	HSH2D
									MAP4K4	HSP90AA1
									MARCKS	HSPB1
									MAST4	HSPD1
									MATK	HSPG2
									MB21D2	HTRA4
									MCEMP1	ICA1
									MCF2L2	ID2
									MDK	ID3
									ME1	IDH1
									MELK	IDO1
									MFHAS1	IER3
									MFSD14B	IER5
									MGAT3	IFI27
									MGLL	IFI44L
									MGST1	IFIT1
									MGST3	IFIT2
									MITF	IFIT3
									MKI67	IFITM2
									MLPH	IFITM3
									MME	IFNLR1
									MMP2	IFT122
									MMP7	IGF1R
									MMP9	IGFBP2
									MND1	IGFBP6
									MNDA	IGLL5
									MOB3B	IGSF6
									MPC2	IL10
									MRC1	IL18R1
									MRPS33	IL1A
									MRPS6	IL1B
									MS4A4A	IL1R1
									MS4A5	IL1R2
									MSMO1	IL1RL1
									MSR1	IL1RN
									MT1G	IL6
									MT2A	IL7R
									MTBP	INPP5A
									MX1	INPP5F
									MYL6B	INSIG1
									MYO1E	INSR
									NAALAD2	INTS6
									NAF1	IQCN
									NARS2	IQGAP3
									NAV1	IRAK2
									NCALD	IRF8
									NCAPH	ISG15
									NCEH1	ITGA6
									NDC80	ITGA7
									NDUFS3	ITGB1BP1
									NEK1	ITGB3
									NELFCD	ITGB5
									NET1	ITGB8
									NFAM1	JAKMIP2
									NFATC2	JAML
									NFKB1	JARID2
									NFKBIA	JMY
									NLRP3	JUN
									NNMT	KAZN
									NOP10	KCNA2
									NPHS1	KCNE1
									NR4A3	KCNJ15
									NRIP1	KCNJ2
									NRP1	KCNMA1
									NRP2	KEL
									NRXN3	KHDRBS3
									NUF2	KIF16B
									NUPR1	KIF18A
									NUSAP1	KLHL6
									OASL	KLK4
									OPRK1	KLRD1
									OSBPL10	KLRG1
									OSBPL11	KPNA2
									OSBPL1A	KRT17
									OSBPL3	KSR1
									OSBPL8	KYNU
									OSM	LARGE1
									OTUD1	LDHC
									P2RX1	LDLR
									PADI2	LDLRAD4
									PALLD	LGALS1
									PAPLN	LGALS2
									PAPSS2	LGALS3
									PARP8	LGALS3BP
									PCBP3	LGMN
									PCNA	LIF
									PCSK5	LILRB4
									PDE3B	LIMA1
									PDE7B	LINGO2
									PDGFC	LMCD1
									PDK1	LMNA
									PDK4	LPL
									PDLIM1	LRCH1
									PDLIM4	LRMP
									PEBP1	LRPAP1
									PELI1	LRRC23
									PFKFB3	LRRK2
									PHLDA1	LSAMP
									PHLDA3	LSP1
									PHLDB2	LTA4H
									PHTF1	LTB
									PID1	LTC4S
									PIM2	LY6E
									PKP2	LYPD3
									PLA2G4A	LYZ
									PLA2G7	MACC1
									PLAC8	MAD2L1
									PLAC9	MAFB
									PLBD1	MALT1
									PLCG2	MAML3
									PLD3	MANF
									PLEKHG2	MAP3K13
									PLIN2	MAP4K4
									PLPP1	MAPRE2
									PLPP3	MARCKS
									PLSCR2	MATK
									PLXNA2	MB21D2
									PMP2	MCEMP1
									PMP22	MCF2L2
									POLB	MCTP2
									POLG2	MEF2C
									PON2	MERTK
									POSTN	MET
									PPBP	METTL7B
									PPIC	MFHAS1
									PPP1R13B	MGAM
									PPP2R3A	MGLL
									PRAG1	MGST1
									PRC1	MGST3
									PRDX1	MIS18BP1
									PRDX4	MITF
									PRIMPOL	MKI67
									PRMT9	MLKL
									PROCR	MLPH
									PSD3	MME
									PSME4	MMP10
									PTGDS	MMP12
									PTGS2	MMP7
									PTMS	MMP9
									PTPRM	MN1
									PTPRS	MND1
									PTTG1	MNDA
									PTX3	MOB3B
									PUS10	MPC2
									PVR	MPP6
									RAB11FIP1	MPZL3
									RAB3A	MRC1
									RAB7B	MREG
									RAD51	MRPS33
									RAD51AP1	MRPS6
									RALA	MS4A4A
									RANBP2	MSLN
									RAPGEF2	MSMO1
									RAPH1	MSR1
									RASAL2	MT1E
									RASGRP3	MT1F
									RASSF8	MT1G
									RBP4	MT1H
									RDX	MT1M
									REEP3	MT1X
									RETN	MT2A
									RETREG1	MTO1
									RGPD1	MTSS1
									RGS1	MUCL1
									RGS12	MX1
									RGS13	MYC
									RHCG	MYL6B
									RHOB	MYL9
									RHOH	MYLIP
									RIN2	MYO1D
									RIPOR2	MYO1E
									RMDN3	MYOF
									RNASE2	NAALAD2
									RNASE6	NAMPT
									RND3	NARS2
									RNF144B	NAV1
									RNF175	NAV2
									ROCK2	NCALD
									RPS23	NCAM1
									RRM2	NCEH1
									RRP12	NCF1
									RSPO3	NCKAP5
									RYR2	NCKAP5L
									S100A10	NCS1
									S100A11	NDP
									S100A8	NDRG1
									S100A9	NDUFS3
									S100B	NEDD4L
									S100P	NEK1
									SAMD12	NELFCD
									SAMD3	NELL2
									SAMD4A	NFE2L3
									SARNP	NFIA
									SASH1	NFKB1
									SCCPDH	NFKBIA
									SCD	NFKBID
									SCGB1A1	NHSL1
									SCGB3A1	NID1
									SDC4	NKG7
									SEC11C	NKX3-1
									SECTM1	NLRP3
									SEMA3C	NMB
									SERPINA1	NNMT
									SERPINB5	NPAS2
									SERPINB9	NR1H3
									SERPINF1	NR4A1
									SERPING1	NR4A3
									SFTPA1	NRIP1
									SFTPA2	NRP1
									SFTPC	NRXN3
									SGK1	OAS1
									SGMS2	OFD1
									SH3BP4	OPN3
									SH3PXD2A	ORAI1
									SHROOM3	OSBPL1A
									SIGLEC10	OSBPL3
									SIK2	OSBPL8
									SIPA1L3	OSM
									SKAP1	OTUD1
									SLA2	P2RX7
									SLC16A10	P2RY8
									SLC16A6	P3H2
									SLC19A3	P4HA1
									SLC1A3	PADI2
									SLC25A18	PALD1
									SLC25A44	PALLD
									SLC27A4	PAM
									SLC2A3	PAPLN
									SLC31A1	PAPOLG
									SLC47A1	PAPSS2
									SLC48A1	PAQR5
									SLC7A11	PC
									SLC8A2	PCBP3
									SLC9A7	PCDH9
									SMC2	PCED1B
									SMOX	PCNA
									SMPDL3B	PCSK1N
									SNAP23	PCSK5
									SNAPC1	PDE3B
									SNED1	PDE4D
									SNRNP25	PDGFC
									SNTB1	PDK1
									SNX2	PDK4
									SNX9	PDLIM1
									SOD2	PDLIM4
									SORBS1	PEBP1
									SORT1	PFAS
									SPATS2L	PFKFB3
									SPC24	PGAP1
									SPC25	PGM1
									SPDYA	PHGDH
									SPOCD1	PHLDA3
									SPP1	PHTF1
									SPSB1	PID1
									SPSB2	PIK3CG
									SPTBN4	PIM2
									SPTLC3	PKP2
									SRGAP1	PLA2G7
									SRGAP2B	PLAC9
									ST3GAL6	PLAU
									STAC	PLBD1
									STAT4	PLEKHA5
									STK38L	PLEKHG2
									STMN1	PLEKHO1
									STOM	PLIN2
									STON1	PLOD2
									STON2	PLPP3
									STRBP	PLTP
									STXBP2	PLXNC1
									SUGCT	PMAIP1
									SVIL	POLG2
									SYAP1	PON2
									SYCP2L	POSTN
									SYNGR1	PPA1
									SYNJ2	PPBP
									SYTL3	PPIC
									TANC2	PPP1R14C
									TBC1D2	PPP2R3A
									TBC1D4	PRAG1
									TBC1D8	PRDM1
									TBC1D9	PRDX1
									TBX20	PRDX4
									TCF19	PRIMPOL
									TDRD3	PRKAR2B
									TEC	PRKCA
									TENM4	PRKX
									TENT4B	PRMT9
									TENT5A	PROC
									TESK2	PROCR
									TEX14	PRPS2
									TFCP2L1	PRR16
									TFDP2	PRSS21
									TFF2	PRXL2A
									TFRC	PSAT1
									TGFBI	PSD3
									THBD	PSTPIP2
									THBS1	PTGDS
									THRB	PTGS2
									TIAM1	PTMS
									TIMP1	PTPN22
									TJP1	PTPRS
									TJP2	PTX3
									TK1	PUS10
									TMEM106C	PVALB
									TMEM131L	QRICH2
									TMEM176A	RAB11FIP1
									TMEM176B	RAB13
									TMEM184C	RAB3IL1
									TMSB4X	RAB7B
									TMTC2	RAD51AP1
									TMX4	RALA
									TNF	RALGPS2
									TNFAIP6	RANBP2
									TNFRSF10D	RAPGEF2
									TNFRSF21	RAPH1
									TNS3	RASAL2
									TOB1	RASGRP3
									TOP2A	RBFOX3
									TPD52	RBP4
									TPPP3	RDX
									TPST1	RECK
									TPX2	REEP3
									TREM2	RETN
									TRHDE	RETREG1
									TROAP	RFX2
									TSPO	RGL1
									TSPYL2	RGPD1
									TTC39B	RGS13
									TUBA1A	RGS16
									TUBB	RGS2
									TULP2	RHCG
									TVP23A	RHOB
									TXN	RHOC
									TXNDC11	RHOH
									UAP1	RIN2
									UBASH3B	RIPOR2
									UBE2C	RMDN3
									UBTD2	RMND1
									UCHL1	RNASE2
									UGCG	RNASE6
									USP36	RND3
									USP37	RNF144B
									USP6NL	RNF175
									UST	RNF19B
									VAMP5	RNLS
									VAV2	RRM2
									VCAN	RRP12
									VCL	RSAD2
									VDR	RTN1
									VGLL3	RUBCNL
									VIL1	RUNX2
									VIM	RUNX3
									VSIG4	RUVBL2
									WDFY4	RYR2
									WDR59	S100A10
									WDR74	S100A11
									YBX1	S100A13
									YES1	S100A16
									YWHAH	S100A8
									ZBTB16	S100B
									ZBTB2	S100P
									ZBTB44	SAMD4A
									ZBTB46	SARNP
									ZBTB7C	SASH1
									ZC3H12C	SCARB1
									ZFX	SCCPDH
									ZFYVE16	SCG5
									ZNF10	SCGB1A1
									ZNF331	SCGB3A1
									ZNF891	SCIN
									ZNRF1	SDC2
									ZWINT	SDC4
										SDF2L1
										SDK1
										SEC11C
										SECTM1
										SEL1L3
										SEMA3C
										SEMA4A
										SERPINA1
										SERPINB2
										SERPINB5
										SERPINB9
										SERPINE1
										SERPING1
										SERPINH1
										SESN2
										SFTPA1
										SFTPA2
										SFTPC
										SGIP1
										SGK1
										SGMS2
										SH3PXD2A
										SH3RF3
										SHOX2
										SHROOM3
										SIGLEC10
										SIPA1L3
										SLAMF1
										SLC10A1
										SLC12A8
										SLC16A1
										SLC16A10
										SLC19A2
										SLC1A3
										SLC20A1
										SLC25A37
										SLC27A4
										SLC2A3
										SLC31A1
										SLC38A1
										SLC41A2
										SLC7A11
										SLC7A8
										SLC8A1
										SLC8A2
										SMAD3
										SMC2
										SMOX
										SMPDL3A
										SNAI1
										SNAPC1
										SNRNP25
										SNX10
										SNX2
										SNX9
										SOD2
										SORT1
										SPARC
										SPATS2L
										SPC24
										SPOCD1
										SPON2
										SPP1
										SPRED1
										SPSB2
										SPTBN1
										SRGAP1
										SRGAP2B
										SRSF12
										SSBP2
										SSBP3
										ST3GAL6
										ST6GAL1
										ST6GALNAC3
										ST8SIA4
										STAC
										STARD13
										STAT4
										STEAP1
										STK38L
										STRBP
										STX3
										STXBP2
										SULF2
										SULT1C2
										SV2B
										SYAP1
										SYCP2L
										TACSTD2
										TANC2
										TATDN1
										TBC1D4
										TBC1D8
										TBC1D9
										TCEAL9
										TCF4
										TCOF1
										TCTN3
										TDO2
										TDRD3
										TDRD6
										TEC
										TENM4
										TENT4B
										TENT5A
										TEX14
										TFCP2L1
										TFPI
										TGFBI
										TGM2
										THADA
										THBD
										THBS1
										THRB
										TIAM1
										TIMP1
										TIMP3
										TINAGL1
										TJP2
										TK1
										TKTL1
										TLR4
										TMEM106C
										TMEM131L
										TMEM176A
										TMEM184C
										TMEM51
										TMSB4X
										TMX4
										TNFAIP6
										TNFRSF10B
										TNFRSF10D
										TNFRSF18
										TNFRSF21
										TNFRSF8
										TNFSF10
										TNFSF14
										TNFSF8
										TNIP3
										TNNI2
										TNNT1
										TNS3
										TOB1
										TOMM40
										TPPP3
										TPST1
										TRAF1
										TREM1
										TREM2
										TRERF1
										TRIM69
										TSPAN15
										TSPAN4
										TSPO
										TSPYL2
										TTC28
										TTC39B
										TUBA1A
										TUBB
										TULP2
										TXN
										TXNDC11
										TXNDC5
										UAP1
										UBASH3B
										UBE2C
										UBE2T
										UCHL1
										UCK2
										USP2
										USP36
										USP37
										USP53
										USP6NL
										USPL1
										UST
										UTP6
										VAMP5
										VAT1
										VAV2
										VAX2
										VCAN
										VCL
										VIM
										WDFY4
										WDR59
										WDR66
										WDR74
										WWOX
										XYLT1
										YBX1
										YES1
										YWHAH
										ZBTB16
										ZBTB44
										ZBTB46
										ZBTB7C
										ZC3H12C
										ZC3HAV1
										ZFAND2A
										ZFX
										ZFY
										ZFYVE16
										ZNF331
										ZNF804A
										ZNRF1
										ZWINT

## Sheet: MRF_BioGrid
B Cell	B Plasma	Dendritic_A	Dendritic_B	Dendritic_C	Dendritic_Langerhans	Dendritic_Plasmacytoid	Innate_lymphoid_A	Innate_lymphoid_B	Macrophage	Macrophage_Alveolar	Mast	Monocyte	Monocyte_Non_Classical	NK	T	T_Cytotoxic	T_Regulatory
ABCA1	ACTB	A2M	ABCA6	ACACB	ACTB	ACACB	ACTB	ACTB	A2M	A2M	ATAD1	ABCA1	ABCA1	A2M	A2M	A2M	ACTB
ABHD3	AFF3	ABCA1	ACTB	ACTB	AHNAK	ACTB	AREG	CHN2	A4GALT	AASS	BEX3	ABHD17C	ABHD17C	ABCA1	ABTB2	ABLIM1	APOBEC3C
ACTB	ARHGAP24	ABCC4	AHNAK	AHNAK	AQP3	ALDH1A1	CCL18	FN1	ABCA1	ABCA1	CRIP1	ABHD3	ABHD5	ACSL3	ACTB	ABTB2	BATF
AFF3	AURKB	ABHD17C	ANXA1	ALCAM	ARHGAP24	ALDH1A2	CCL5	HSPA5	ABCA6	ABCA6	LTC4S	ABHD5	ACKR3	ACTB	ADAM23	ACSL4	C1QA
AHNAK	BACH2	ACOT7	ANXA2	ANK3	AURKA	ANXA1	CRIP1	LTB	ABCG2	ABCC4	MAOB	ABL1	ACTB	ADAMTS17	AHNAK	ACTB	C9orf16
ANK3	BCL2	ACSL3	AQP3	ARHGAP10	AVEN	AREG	CRYBG1	PCDH9	ABHD5	ABCG2	RGS16	ABTB2	ADAM28	ADCY9	AKAP6	ACYP2	CADM1
AP1B1	BCL7A	ACTB	AREG	ATP1B3	CD207	AZI2	FN1	PPP1R16B	ABL1	ABHD17C	TINAGL1	ACOT7	ADAMTS2	ADGRG5	ALOX5AP	ADAMTS17	CALM3
APOC1	BIRC5	ADAM28	ATP2B4	BCAT1	CDH1	BCL2L11	HOPX	SCGB1A1	ABTB2	ABHD3		ACSL3	ADCY3	AHNAK	ANKRD26	AHNAK	CAMK1D
APOE	BUB1B	ADCY3	BASP1	BCL2A1	CPM	CCL18	ITM2C	SCGB3A1	ACACB	ABHD5		ACSL4	ADCY9	AK5	ANKRD28	ALOX5AP	CAMK4
ARHGAP24	CAMK2D	ADGRE2	BCL2A1	BICDL1	CRIP2	CD80	LDLRAD4	SFTPC	ACKR3	ABL1		ACTB	ADGRE2	ANKRD28	ANXA1	ANK3	CCDC88A
ATF7IP2	CCL18	AFF3	BCR	CCL18	CYTH3	CENPU	LMNA	TMSB4X	ACO1	ACACB		ADAMTS17	AHNAK	ANXA1	ANXA2	ANKRD28	CCL18
AUTS2	CD22	AGPAT4	CAMK1D	CD70	DPF3	CENPW	LSP1	VIM	ACOT1	ACKR3		ADAMTS2	ALDH1A1	APBA2	APBA2	ANXA1	CD177
BANK1	CD79A	AHNAK	CAPG	CD80	DUSP6	CHIT1	MAPRE2		ACOX1	ACOT1		ADCY3	ALDH1A2	APOBEC3C	APOBEC3C	APBA2	CD69
BFSP2	CD79B	AKAP12	CCDC30	CD83	FCGBP	CLU	NKG7		ACP2	ACOT13		ADCY9	AMPD3	APOC1	APOC1	APOBEC3C	CD7
BIRC3	CDK1	ALCAM	CCL18	CD84	FN1	COL1A1	SCGB1A1		ACSM3	ACOT7		ADGRE2	AMPH	APOE	APOE	APOC1	CHN1
BLK	CEP128	ALDH2	CD83	CD86	GBP1	CPM	SCGB3A1		ACTB	ACP2		AHNAK	ANKRD22	AREG	AREG	APOE	CLNK
C1QA	CIT	AMPD3	CD86	CERS6	HK2	CPVL	SFTPC		ACYP2	ACP5		ALCAM	ANKRD28	ATP1B3	ARHGAP10	AREG	COL19A1
C1QB	DUT	ANK3	CDH1	CHKA	HSP90AA1	CRIP1	SLC2A3		ADAP1	ACSL4		ALDH1A1	ANXA1	ATP2B4	ATF7IP2	ARHGAP10	CPE
C1QC	EBF1	ANKRD22	CHSY1	CHSY1	ITGB5	CSTA	SPP1		ADCY3	ACTB		ALDH2	ANXA2	AUTS2	ATP1B3	BAG3	CRIP1
CARD11	FN1	ANKRD28	CPM	CLIP2	LARGE1	CTSA	TMSB4X		ADIPOR2	ACYP2		ALOX5AP	APOBEC3A	BACH2	AUTS2	BCAS2	EBI3
CARMIL1	GCSAM	ANLN	CRIP1	CPM	LIMA1	CXADR	TRAF3IP3		ADTRP	ADAM12		AMPD3	APOBEC3C	BAG3	BAG3	BCL11B	FAM102A
CCL18	HLA-DMB	ANXA1	CRYBG1	CRIP1	LMNA	CXCR3	TRERF1		AFDN	ADAM17		AMPH	AREG	BCL2L11	BATF	BCL2L11	FN1
CD6	HLA-DPA1	ANXA2	CST3	CRYBG1	LRRC23	ECE1	TXK		AGPAT4	ADAM28		ANGPTL4	ARSG	BNC2	BCL11B	BCR	GAPDH
CD63	HLA-DPB1	AP1B1	CSTB	CSGALNACT1	MCEMP1	EEPD1	UBASH3B		AGPAT5	ADAMTS17		ANKH	ATF6	BTBD11	BCL2	BFSP2	ICA1
CD70	HLA-DQA1	APOBEC3C	CXCL2	CST3	MPP6	EGR1	VIM		AGRP	ADAMTS2		ANKRD22	ATP1B3	C1QA	BCL2L11	BIRC3	IL12RB2
CD74	HLA-DQB1	AQP3	CXCL8	CXCL8	MYC	EPHA4			AHNAK	ADGRE2		ANKRD28	ATP2C1	C1QB	BIRC3	BTG2	ITM2A
CD79A	HLA-DRA	AREG	DBI	DENND5A	MYL9	EPS8			AHR	ADGRV1		ANXA1	BACH2	C1QC	BRCA2	C12orf75	LAIR2
CD83	HLA-DRB1	ARHGAP31	DNAJA1	DNM1	MYO6	EREG			AK5	ADIPOR2		APOBEC3A	BAG3	C9orf16	BTG2	C16orf54	LDLRAD4
CENPK	HLA-DRB5	ASGR1	EMP1	DRAM1	NKG7	FARP1			AKAP12	AGPAT4		AREG	BASP1	CAMK1D	BUB1B	C1orf21	LRIG1
CENPM	HMGA1	ATF3	FGD4	EPHX2	NRN1	FCGR3A			AKR1B1	AGPAT5		ARHGAP10	BCAT1	CARD11	C12orf75	C1QA	LTB
CERS4	HMGB2	ATF6	FN1	ETV3	PDK4	FLVCR2			AKR1C1	AGRP		ARMC8	BCL2A1	CASS4	C1QA	C1QB	MB21D2
CLIC4	HMGN2	ATP2B4	FYN	EZH2	PELI1	FN1			AKR1C2	AHNAK		ARSG	BCL2L11	CBLB	C1QB	C1QC	MT2A
CMSS1	IGF2BP3	ATP2C1	HLA-DRB5	FGD4	PFAS	FUCA1			AKR1C3	AIFM1		ATF3	BCR	CCL18	C1QC	C9orf16	NAMPT
CNR1	IRF8	AURKB	HSP90AA1	FN1	PLAU	FXR2			ALAS1	AKAP12		ATF6	BIRC3	CCL20	C9orf16	CALM3	PCSK1N
CRYBG1	ITPKB	AUTS2	HSPA1A	FRMD4A	PRKAR2B	GLUL			ALDH1A1	AKAP6		ATP1B1	BLOC1S2	CCL3	CALM3	CAMK1D	PDE7B
CST3	KLF12	AVPI1	IFITM2	GAB1	PTPRM	HAUS2			ALDH1A2	AKR1B1		ATP1B3	BRCA2	CCL5	CAMK1D	CAPG	PPP1R16B
CXCL8	LTB	AXL	IFITM3	GCNT2	RAPH1	HBEGF			ALDH2	AKR1C1		ATP2C1	BSG	CD247	CAMK2D	CARD11	RIPOR2
DOCK4	MAPRE2	AZI2	LDLRAD4	GPC5	RNLS	HK2			ALG13	AKR1C2		AUTS2	BTBD11	CD3D	CAPG	CBLB	SCGB1A1
DUSP4	MARCKSL1	BAG3	LGALS1	GPR183	RUBCN	HSPA5			ALG9	AKR1D1		AVPI1	C15orf48	CD3G	CARD11	CCL18	SCGB3A1
ETS1	MELK	BASP1	LGALS2	GRAMD1B	S100A10	HSPG2			ALK	ALCAM		AZI2	C1QA	CD69	CASS4	CCL3	SFTPC
EZH2	MND1	BCAR3	LIMA1	GSN	SCCPDH	HSPH1			ALOX15B	ALDH1A1		BACH2	C1QB	CDK6	CCDC30	CCL5	SLC2A1
FABP4	MS4A1	BCL11A	LMNA	HIP1	SCGB3A1	IFITM3			ALOX5AP	ALDH1A2		BAG3	C1QC	CEBPD	CCL18	CD2	SLC8A1
FAM102A	MYBL1	BCL2A1	LSP1	HIVEP1	SDC4	IL1R2			AMIGO2	ALDH2		BAIAP2	C5AR2	CENPE	CCL20	CD2AP	SPP1
FCER2	MYC	BCL2L11	LTB	HLA-DPA1	SEMA3C	IL7R			AMOTL1	ALK		BASP1	C9orf16	CENPK	CCL5	CD3D	TBC1D4
FCHSD2	MYO1E	BCR	MALT1	HLA-DPB1	SGPP1	INSIG1			AMPH	ALOX15B		BATF	CABLES1	CEP78	CCSER1	CD3E	THADA
FN1	NAMPT	BEST1	MPZL3	HLA-DRB5	SH3PXD2A	INSR			ANGPTL4	ALOX5AP		BCAS2	CALM3	CHAF1A	CD226	CD3G	TIAM1
GAB1	NDC80	BHLHE41	MYC	HSP90AA1	SPP1	KCNE1			ANK2	AMIGO2		BCAT1	CAVIN2	CHIT1	CD28	CD6	TIMP1
HERPUD1	NFKBIA	BIRC3	NAMPT	HSPH1	TACSTD2	LGALS1			ANKRD22	AMPD3		BCL2	CBLB	CHKA	CD3D	CD63	TMSB4X
HLA-DPA1	PAG1	BIRC5	NFKB1	ID2	TCF7L2	LMNA			ANKRD28	AMPH		BCL2A1	CCL18	CHN2	CD3E	CD69	TNFRSF13B
HLA-DPB1	PAX5	BMP6	NFKBIA	IFITM3	TPD52	LPL			ANLN	ANGPTL4		BCL2L11	CCSER1	CIR1	CD3G	CD7	TNFRSF18
HLA-DQB1	PCNA	BNC2	NFKBID	IL1R1	TTYH2	LRRC23			ANOS1	ANK3		BCR	CD14	CKS2	CD69	CD70	TOX2
HLA-DRA	PELI1	BRCA2	PDE3B	IL21R	VIM	MALT1			ANXA1	ANKRD22		BIRC3	CD163	CLIC3	CD74	CD74	TPPP3
HLA-DRB5	PTTG1	BSG	PELI1	IL7R	ZBTB16	MAST4			ANXA2	ANKRD28		BLVRB	CD2AP	CLIP2	CD83	CD83	UST
HSP90AA1	RAPGEF5	BTBD11	PKP2	IQCN		MED12L			AOC3	ANKRD55		BMP6	CD300E	CNOT6L	CDC14A	CD8A	VIM
IFI27	RGS13	C10orf90	PMAIP1	JARID2		MGST3			AP1B1	ANOS1		BORCS5	CD36	COL1A2	CEBPD	CDC14A
INPP5A	RIPOR2	C12orf75	PRKAR2B	KYNU		MSMO1			APBB2	ANXA1		BTBD11	CD74	COL6A2	CEMIP2	CDK6
IQCN	RUBCNL	C15orf48	RALA	LGALS2		MT1E			APIP	ANXA2		C10orf90	CD79B	CRIP1	CERS6	CEP128
IRF8	SAMD12	C1QA	RAPGEF2	LSP1		MT2A			APLP1	AOC3		C15orf48	CD80	CRYBG1	CHAF1A	CFD
JADE3	SCGB1A1	C1QB	RAPH1	MALT1		MYL6B			APOBEC3C	AP1B1		C1QA	CD83	CST7	CHI3L1	CHI3L1
JUN	SCGB3A1	C1QC	RGS2	MB21D2		NEBL			APOE	APBB2		C1QB	CD86	CXCL8	CHIT1	CHIT1
KLHL14	SLC38A1	C5AR2	S100A10	MERTK		NFE2L3			APOL2	APIP		C1QC	CD9	CYP20A1	CHKA	CHKA
LARGE1	SPP1	C9	SCGB1A1	MGLL		NLRP3			AQP3	APOBEC3A		C5AR2	CDC14A	DDIT3	CHN2	CHN2
LMNA	STMN1	C9orf16	SCGB3A1	MPZL3		NR4A3			AR	APOBEC3C		C9	CDC42BPB	DENND4C	CIR1	CIR1
LSAMP	TCL1A	CABLES1	SFTPC	NAV1		PAK1			AREG	APOC1		CABLES1	CEP128	DENND5A	CITED2	CKS2
LTB	TK1	CAMK1D	SGMS2	NAV2		PDK4			ARHGAP10	APOE		CALM3	CFD	DNAH6	CLEC2D	CLNK
LY6E	TMEM131L	CARD11	SH3BP4	NET1		PLEKHG2			ARHGAP31	APOL2		CBFA2T3	CGAS	DNAJB1	CLU	CLU
MALT1	TMSB4X	CARMIL1	SLC1A3	NFE2L3		PMP22			ARHGAP32	AQP3		CCDC30	CHCHD10	DOCK11	CMSS1	CMC1
MAP4K4	TPX2	CASS4	SLC2A1	NFKB1		PPARG			ARHGEF28	ARAP2		CCDC88A	CHST15	DOCK3	CMTM8	CMSS1
MAPRE2	YWHAH	CAVIN2	SLC2A3	NFKBIA		PPBP			ARMC8	AREG		CCL18	CITED2	DOCK4	CNOT6L	CNOT6L
MARCKSL1	ZNF608	CCL18	SMAD3	NFKBID		PPP1R14A			ARRDC4	ARHGAP10		CCND2	CKB	DUSP6	COL1A1	COL19A1
MED12L		CCL20	SOD2	NHSL1		PPP1R16B			ARSG	ARHGAP24		CCSER1	CLEC4E	DUT	COL1A2	COL1A1
MMP7		CCL3	SPP1	PCED1B		PRPS2			ARSI	ARHGAP31		CD109	CLIC2	ECE1	CRIP1	COL1A2
MYC		CCL4	SQSTM1	PDK4		PTPRM			ASF1B	ARHGAP32		CD14	CLIC4	EFNA5	CRYBG1	CRIM1
NAMPT		CCL4L2	TACSTD2	PIK3CG		RAB13			ASPM	ARL4D		CD163	CMSS1	EPAS1	CSGALNACT1	CRIP1
NEDD9		CCSER1	TCF4	PKP2		RNF144B			ASTL	ARMC8		CD22	COL1A2	EPB41L5	CSTB	CRYBG1
NFKB1		CD14	TNFSF8	PLEKHA5		S100A10			ATAD1	ARRDC4		CD2AP	COL6A2	ETS1	CTLA4	CSGALNACT1
NOP10		CD163	TPPP3	PMAIP1		SCGB1A1			ATAD2	ARSG		CD300E	CRADD	EZH2	CTSA	CST7
NR4A3		CD1A	TRAF1	PRKAR2B		SCGB3A1			ATF3	ASTL		CD36	CREB5	FABP4	CTSW	CTH
OSBPL3		CD1B	VDR	RAMP1		SERPINB9			ATF6	ATAD1		CD63	CRIP1	FARP2	CXCL8	CTSA
PAK1		CD1E	VIM	RDX		SGMS2			ATP1B1	ATF3		CD74	CRIP2	FCGR3A	CYP20A1	CTSW
PALD1		CD207	WDFY4	RGS1		SH3RF3			ATP1B3	ATF6		CD80	CSF2RA	FGFBP2	CYSLTR2	CXCL8
PCBP3		CD36	XYLT1	RUBCN		SLC1A3			ATP2B4	ATP1B3		CD83	CSGALNACT1	FN1	DAPK2	CYP20A1
PDE3B		CD70	YBX1	SCGB1A1		SLC20A1			ATP2C1	ATP2B4		CD86	CST3	FNIP2	DBI	DBI
PELI1		CD74	ZC3H12C	SCGB3A1		SMAD3			ATP6V0D2	ATP2C1		CDC14A	CSTA	FOXO1	DCN	DDIT3
PLIN2		CD83		SERPINB9		SOX4			AURKA	ATP6V0D2		CDCP1	CSTB	FTL	DDHD1	DDX58
POLB		CD84		SLC1A3		SPAG4			AURKB	AURKA		CDH23	CTSB	FYN	DDIT3	DNAJA1
PPBP		CD86		SLC41A2		SPP1			AVPI1	AURKB		CEBPD	CTTNBP2NL	GADD45A	DDX58	DNAJB1
PRSS3		CD9		SLCO5A1		SPSB2			AXDND1	AUTS2		CEMIP	CXCL2	GAS7	DHRS3	DOCK11
RAB11FIP1		CDC20		SMAD3		SRGAP1			AXL	AVPI1		CENPE	CXCL8	GFOD1	DNAJA1	DOCK4
RALA		CDH1		SOD2		SRGAP2B			AZI2	AZI2		CENPW	CYSLTR2	GNG2	DNAJB1	DRAM1
RANBP2		CDH20		SPP1		STOM			B3GALNT2	BAALC		CFD	DAAM2	GNLY	DOCK4	DUSP16
RGS2		CDH23		SRGAP1		TCF4			BACH2	BACH2		CHI3L1	DBI	GPR141	DPP4	DUSP4
RHEX		CDK1		SRGAP2B		TCOF1			BAG3	BAG3		CHIT1	DDHD1	GZMA	DUSP16	DUT
RNASE6		CEBPD		ST3GAL6		TGM2			BAIAP2	BAIAP2		CHN2	DENND4C	GZMB	DUSP4	EREG
RPS23		CENPE		ST6GAL1		THBS1			BASP1	BANK1		CHST15	DENND5A	HERPUD1	DUT	ESR2
RRP12		CENPK		ST6GALNAC3		TIMP1			BCAR3	BASP1		CIR1	DNAJA1	HIVEP1	EDARADD	ETS1
S100A8		CENPU		STAT4		TK1			BCL2	BATF		CLCN3	DNAJB1	HIVEP2	EGR1	EZH2
SCGB1A1		CGAS		TBC1D4		TMEM51			BCL2A1	BCAR3		CLEC4E	DOCK4	HLA-DPB1	EMP1	FABP4
SCGB3A1		CHAF1A		TEX14		TMSB4X			BCL2L11	BCAS2		CLEC5A	DRAM1	HOPX	ERO1B	FAM102A
SDK2		CHCHD10		TIAM1		TNFRSF13B			BEX1	BCAT1		CLIC2	DUSP16	HSH2D	ESR2	FAM110B
SFTPC		CHI3L1		TNFSF8		TNFSF8			BEX3	BCL2		CLIP2	DUSP6	HSPA1A	ETS1	FAM126A
SH3RF3		CHIT1		TRAF1		TPPP3			BICDL1	BCL2A1		CLU	DUT	HSPA5	ETV7	FAM160B1
SLC27A4		CHKA		UBASH3B		TREM1			BIRC3	BCL2L11		CMSS1	EBI3	HSPB1	EZH2	FARP2
SLC2A3		CHN2		USP54		TREM2			BIRC5	BCR		COL1A1	EEPD1	HSPD1	FABP4	FLNB
SNX9		CIR1		UVRAG		VIM			BLOC1S2	BEX1		COL1A2	EGR1	HSPH1	FAM102A	FN1
SPP1		CITED2		VIM		WDR74			BLVRB	BIRC3		COL23A1	EIF4A3	IER2	FAM214A	FOXO1
ST6GAL1		CKS1B		WDR74		ZBTB16			BORCS5	BIRC5		CRADD	EPB41L2	IFI27	FARP2	FTH1
TCF4		CLEC10A		ZBTB16		ZFX			BRAT1	BIRC7		CREB5	EPN2	IGF1R	FBXO32	FTL
TCL1A		CLEC11A		ZC3HAV1					BRCA2	BLOC1S2		CREG1	EPS8	IGF2BP2	FCHSD2	G0S2
TEX14		CLEC4F							BRI3	BLVRB		CRIP1	EPSTI1	IGLL5	FN1	GALM
THRB		CLEC5A							BSG	BMP6		CRISPLD2	EREG	IKZF3	FOXO1	GAPDH
TMEM131L		CLIC4							BTBD11	BNC2		CRYBG1	ERN1	IL12RB2	FYN	GBP3
TMSB4X		CMSS1							BUB1B	BRCA2		CSGALNACT1	ETV3	IL1R2	G0S2	GLCCI1
TNFSF8		COL1A2							C10orf90	BRI3		CST6	EZH2	IL32	GALM	GOLIM4
TOX		COL6A1							C15orf48	BSG		CTH	FABP4	IQCN	GAPDH	GPR141
TPD52		COLEC12							C1QA	BTBD11		CTSB	FAM117B	IRAK2	GBP5	GPX3
TPPP3		COMT							C1QB	BTG2		CTSK	FARP2	JUN	GNAO1	GRN
TRAF3IP3		CPM							C1QC	C10orf90		CTSL	FBP1	KIR2DL4	GNG2	GZMA
TTC28		CPVL							C5AR2	C16orf54		CTSZ	FCAR	KIR3DL1	GPX3	GZMB
TXLNB		CRIP1							C8B	C16orf74		CTTNBP2NL	FCGR3A	KLF12	GRB10	HERC5
TXN		CRIP2							C9	C1QB		CXCL2	FCHO2	KLRC1	GZMA	HIP1
USP6NL		CRYBG1							C9orf16	C1QC		CXCL8	FCHSD2	KLRD1	HAUS2	HIVEP1
WDFY4		CSF2RA							CA12	C1QTNF1		CYTH3	FCN1	KLRG1	HERC5	HLA-DPA1
WDR74		CSGALNACT1							CABLES1	C2		DAAM2	FER	LAIR2	HERPUD1	HLA-DPB1
XYLT1		CST3							CADM1	C5AR2		DBI	FGD2	LAPTM4B	HIP1	HLA-DQB1
YWHAH		CST6							CADPS2	C9		DBT	FGD4	LDLR	HIVEP1	HMOX1
ZBTB16		CSTB							CALB1	C9orf16		DDX60L	FGFR1	LDLRAD4	HIVEP2	HOPX
ZNF331		CTSK							CALM3	CA12		DENND5A	FLVCR2	LGALS1	HLA-DPA1	HSP90AA1
ZNF608		CTSZ							CAMK1D	CA2		DNAJA1	FMN1	LMNA	HLA-DQA1	HSPA5
		CXCL2							CAMK2D	CA8		DNAJB1	FN1	LRIG1	HLA-DQB1	HSPB1
		CXCL8							CAMP	CABLES1		DNASE2	FNDC3A	LSAMP	HLA-DRA	IFI27
		CYTH3							CARD11	CADPS2		DOCK4	FNIP2	LSP1	HLA-DRB1	IFIT2
		DAPP1							CASS4	CALM3		DOP1B	FOXK2	MAPRE2	HLA-DRB5	IFNG
		DBI							CAVIN2	CAMK1D		DST	FPR2	MFSD14B	HMOX1	IGLL5
		DDHD1							CAVIN3	CAPG		DTL	FTL	MLKL	HOPX	IL12RB2
		DDIT3							CBLB	CARD11		DUSP4	FYN	MMP7	HSP90AA1	IL1R2
		DENND5A							CCDC138	CARMIL1		DUT	G0S2	MPP6	HSPA5	IL32
		DIAPH3							CCDC18	CASS4		EDA	GAB1	MSR1	HSPB1	IL7R
		DNAJA1							CCDC36	CAVIN2		EEPD1	GAPDH	MTSS1	HSPG2	INPP5A
		DNAJB1							CCDC83	CAVIN3		EIF2AK3	GAS7	MYO1D	IFI27	IQCN
		DNASE2B							CCDC88A	CBLB		EPAS1	GBP1	NAMPT	IFNG	IRAK2
		DNMBP							CCL13	CCDC181		EPN2	GBP5	NCALD	IGLL5	ISG15
		DOCK4							CCL18	CCDC30		EPS8	GK	NCKAP5L	IKZF3	ITM2C
		DRAM1							CCL2	CCDC36		EREG	GLIS3	NFATC2	IL12RB2	JCHAIN
		DTL							CCL20	CCDC80		ERN1	GLUL	NFKB1	IL1B	JMY
		DUSP16							CCL21	CCDC88A		ERRFI1	GNG2	NFKBIA	IL1R2	JUN
		DUSP4							CCL23	CCL13		ETV3	GRAMD2B	NKG7	IL21R	KLF12
		DUSP6							CCL4	CCL18		F13A1	GRK5	NUPR1	IL32	KLRG1
		DUT							CCL4L2	CCL2		FABP4	GTF2IRD1	OFD1	IRAK2	KPNA2
		EBI3							CCL7	CCL20		FABP5	HBEGF	PAK1	ITK	KRT17
		EEPD1							CCNA2	CCL22		FAM20C	HCK	PAM	ITM2A	LAIR2
		EGR2							CCNB1	CCL23		FAM214A	HIP1	PARP8	JAML	LAPTM4B
		EMP1							CCNB2	CCL4		FARP2	HIVEP1	PCSK5	JMY	LDHB
		EMP2							CCSER1	CCL4L2		FCAR	HIVEP2	PDE4D	KLRD1	LDLR
		ENTPD7							CD163	CCL5		FCER1A	HLA-DPA1	PDK1	KLRG1	LDLRAD4
		EPSTI1							CD22	CCL7		FCGR3A	HLA-DPB1	PFKFB3	KRT17	LGALS1
		EREG							CD274	CCNA2		FCHO2	HLA-DQA1	PLIN2	KSR1	LGALS3BP
		ETV3							CD2AP	CCNB2		FCHSD2	HLA-DQB1	POLB	LAIR2	LRIG1
		EZH2							CD300E	CCND1		FCN1	HLA-DRA	PON2	LDHB	LSAMP
		FABP5							CD36	CCND2		FER	HLA-DRB1	PPBP	LDLR	LSP1
		FAM160A1							CD59	CCSER1		FGD4	HS3ST3B1	PPP1R13B	LDLRAD4	LY6E
		FBP1							CD63	CD14		FGF18	HSP90AA1	PPP1R16B	LEF1	MALT1
		FCER1A							CD7	CD163		FGFR1	HSPA1A	PRDM1	LGALS1	MAML3
		FCGBP							CD74	CD1A		FILIP1L	HSPA5	PRF1	LMNA	MANF
		FCN1							CD80	CD1B		FLNB	HSPB1	PRKX	LRIG1	MAPRE2
		FGD2							CD86	CD1E		FLT1	HSPD1	PTPN22	LSAMP	MARCKSL1
		FGF18							CD9	CD28		FLVCR2	HSPH1	RAP1GAP2	LSP1	MCTP2
		FGL2							CDA	CD300E		FMN1	ID2	RHOB	LTB	MGST3
		FLNB							CDC20	CD36		FMNL2	IER2	RHOC	LTC4S	MLKL
		FLT1							CDC25C	CD3D		FN1	IFITM2	RHOH	LY6E	MMP7
		FLT3							CDCA3	CD59		FNDC3A	IFITM3	RIPOR2	MANF	MPP6
		FMN1							CDCA5	CD63		FNIP2	IGF1R	S100A8	MAPRE2	MT2A
		FMNL2							CDCA8	CD69		FOLR3	IGF2BP2	S100A9	MATK	MTSS1
		FN1							CDCP1	CD7		FOXK2	IGFBP6	SCGB1A1	MB21D2	MYC
		FNDC3A							CDH1	CD74		FOXO1	IL10	SCGB3A1	MCTP2	MYO1D
		FNIP2							CDH23	CD83		FPR2	IL15	SERPINB9	MED12L	NAMPT
		FOXO1							CDK1	CD84		FRMD4A	IL18R1	SERPINE1	MFHAS1	NCAM1
		FPR2							CDK6	CD9		FTL	IL1B	SERPING1	MMP7	NCAM2
		FRY							CDKN2A	CDA		FYN	IL1R1	SFTPA1	MPP6	NFATC2
		FTH1							CDKN2C	CDC14A		G0S2	IL1R2	SFTPC	MT2A	NFKB1
		G0S2							CDKN3	CDC20		GADD45B	INPP5A	SH2D1B	MYC	NFKBIA
		GADD45B							CDT1	CDC42BPB		GAPDH	INSR	SKAP1	MYL6B	NKG7
		GAS7							CEACAM8	CDCA3		GAS7	IQCN	SLC27A4	MYLIP	NR4A1
		GCLC							CEMIP	CDCP1		GBE1	IRAK2	SLC2A3	MYO1D	NUPR1
		GCLM							CENPA	CDH1		GBP1	IRF8	SMAD3	NAMPT	OASL
		GFOD1							CENPE	CDH23		GK	ITGB8	SOD2	NCAPH	OSM
		GK							CENPF	CDK6		GLDC	ITPKB	SORBS1	NDRG1	PAK1
		GLUD1							CENPM	CDKN2A		GLRX	JARID2	SPECC1	NFKB1	PAM
		GLUL							CENPO	CDKN3		GLT1D1	JUN	SPON2	NFKBIA	PARP8
		GNG2							CENPU	CDT1		GLUL	KCNMA1	SPP1	NLRP3	PCNA
		GNG4							CENPW	CEACAM8		GNG4	KSR1	ST6GAL1	NTRK2	PDE3B
		GNG7							CEP128	CEBPD		GPAT3	KYNU	SYTL3	NUPR1	PELI1
		GOLM1							CEP44	CEMIP		GPR137B	LGALS1	TANC2	OASL	PFKFB3
		GPAT3							CEP55	CENPK		GPRC5A	LGMN	TC2N	OSBPL8	PHLDA1
		GPR183							CERS6	CENPM		GRAMD1B	LILRB4	TEX14	OSM	PHLDA2
		GPX3							CFAP161	CENPP		GRAMD2B	LMNA	TFDP2	PAG1	PIM2
		GRAMD2B							CFD	CENPU		GRN	LRCH1	THADA	PCSK1N	PLCG2
		GRN							CHDH	CENPW		GSN	LRRK2	THBS1	PDE3B	PLEKHA5
		GSN							CHI3L1	CEP128		GTF2IRD1	LSAMP	TMSB4X	PDE4D	PLIN2
		HCK							CHIT1	CEP44		HBEGF	LSP1	TNF	PDE7B	PLPP1
		HES4							CHKA	CERS4		HELB	LTA4H	TPPP3	PEBP1	POLB
		HIP1							CHN2	CERS6		HES1	LTB	TPST1	PELI1	POLE2
		HIVEP1							CHRM3	CFAP161		HES4	LY6E	TRAF3IP3	PHTF1	PON2
		HIVEP2							CHSY1	CFD		HEY1	MAFB	TRERF1	PLAC8	PPBP
		HK2							CIR1	CHCHD10		HIP1	MALT1	TUBB	PLCG2	PPP1R13B
		HLA-DMB							CIT	CHCHD6		HIVEP1	MAML3	TXK	PLIN2	PPP1R16B
		HLA-DPA1							CKAP2L	CHI3L1		HIVEP2	MAP4K4	TXNDC11	PLPP1	PRKCA
		HLA-DPB1							CKS1B	CHIT1		HK2	MAPRE2	UAP1	PON2	PRKX
		HLA-DQA1							CKS2	CHKA		HLA-DMB	MARCKSL1	UBASH3B	PPA1	PTPRM
		HLA-DQB1							CLCN3	CHN2		HLA-DPA1	MB21D2	USP37	PPARG	RAB7A
		HLA-DQB2							CLDN12	CHRM3		HLA-DPB1	MCTP2	VIM	PPBP	RALA
		HLA-DRA							CLEC11A	CHST15		HLA-DQA1	MDC1	VIPR2	PPP1R16B	RAP1GAP2
		HLA-DRB1							CLEC17A	CHSY1		HLA-DQB1	MDM2	WDR74	PPP2R2B	RHOH
		HLA-DRB5							CLEC5A	CIR1		HLA-DRA	MERTK	WWOX	PRKCA	RIPOR2
		HMGA1							CLIC2	CITED2		HLA-DRB1	MET	XCL1	PSTPIP2	RNLS
		HMOX1							CLIC4	CKS1B		HLA-DRB5	MOB3B	XCL2	PTPN22	RPS23
		HOMER1							CLIP2	CKS2		HMGB2	MPZL3	YES1	RAB3IL1	RRAS2
		HS3ST3B1							CLSPN	CLCN3		HMOX1	MSMO1	ZBTB16	RAB7A	S100A10
		HSP90AA1							CLU	CLEC10A		HOMER1	MSR1	ZEB1	RAPGEF5	S100A8
		HSP90B1							CMC1	CLEC11A		HP	MT2A		RASAL2	S100A9
		HSPA1A							CMSS1	CLEC1A		HSP90AA1	NAMPT		RCAN2	SAMD3
		HSPA5							COL1A1	CLEC4E		HSP90B1	NAV1		RETREG1	SCGB1A1
		HSPB1							COL1A2	CLEC5A		HSPA1A	NCF1		RGPD1	SCGB3A1
		HSPD1							COL4A2	CLIC2		HSPD1	NDUFS3		RIPOR2	SDF2L1
		HSPG2							COL6A2	CLIC4		HSPG2	NEBL		RNF122	SERPING1
		HSPH1							COLEC12	CLIP2		HSPH1	NEDD9		RPS23	SERPINH1
		ID2							COMT	CLNK		HTRA1	NEK1		RRAS2	SFTPA1
		IDO1							CORO2A	CLSPN		ID2	NFAM1		S100A10	SFTPA2
		IER3							CPE	CLU		ID3	NFKB1		S100A11	SFTPC
		IER5							CPM	CMC1		IDH1	NFKBIA		S100A8	SGCD
		IFI44L							CPVL	CMSS1		IER2	NFKBID		S100A9	SH2D1B
		IFITM2							CRADD	CMTM8		IER5	NOP10		SAMD3	SLC12A2
		IFITM3							CREG1	CNOT6L		IFI44L	NPHP4		SARNP	SLC27A4
		IFNLR1							CRIM1	COL19A1		IGF1R	NR4A3		SCGB1A1	SLC2A1
		IGLL5							CRIP1	COL1A1		IGSF6	OAS1		SCGB3A1	SLC2A3
		IGSF6							CRIP2	COL1A2		IL10	OPN3		SEC11C	SLC41A2
		IL10							CRYBG1	COL23A1		IL18R1	OSBPL8		SERPING1	SNTB1
		IL18R1							CSF2RA	COL4A2		IL1RAP	P2RY8		SERPINH1	SNX9
		IL1B							CST3	COL6A1		IL1RL1	PAK1		SFMBT1	SORBS1
		IL1R2							CST6	COL6A2		INPP5A	PAM		SFTPA1	SPECC1
		IL1RL1							CSTA	COLEC12		INSIG1	PAPSS2		SFTPA2	SPOCK2
		INPP5F							CSTB	COMT		INSR	PARP8		SFTPC	SPON2
		INSR							CTAG2	CPM		IQCN	PCSK5		SH3RF3	SPP1
		IQCN							CTH	CPVL		IRF8	PDE3B		SIPA1L3	SQSTM1
		IRAK2							CTNNAL1	CRABP2		ITGB5	PDE4D		SKAP1	STMN1
		IRF8							CTSB	CRADD		ITGB8	PDK1		SLC22A23	STRBP
		ISG15							CTSG	CREB5		ITPKB	PDK4		SLC27A4	STX3
		ITGB8							CTSK	CRIP1		JAML	PDLIM1		SLC2A1	SYAP1
		JAKMIP2							CTSW	CRIP2		JARID2	PELI1		SLC2A3	SYTL3
		JARID2							CXADR	CRISPLD2		JMY	PFKFB3		SNTB1	TAF4B
		JCHAIN							CXCL2	CRYAB		JUN	PID1		SNX9	TC2N
		KCNE1							CXCL5	CRYBG1		KCNE1	PLA2G4A		SOD2	TCOF1
		KCNIP1							CXCL8	CRYM		KCNMA1	PLAC8		SOX5	TCTN3
		KCNMA1							CYP20A1	CSF1		KDM2B	PLCG2		SPARC	TEC
		KIF16B							CYP27A1	CSF2		KLRG1	PLEK		SPP1	TESK2
		KIF2C							CYTH3	CSF2RA		KPNA2	PLEKHA5		SPTBN1	TEX14
		KIT							DBI	CSGALNACT1		KRT17	PLIN2		SRGAP2B	TFRC
		KLRD1							DBT	CST3		KYNU	PLXNA2		SSBP3	THADA
		KLRG1							DCN	CST6		LDLR	PLXNC1		STMN1	THBS1
		KNL1							DDHD1	CSTA		LGALS1	PPARG		STOM	THEMIS
		KRT17							DDIT3	CSTB		LGALS2	PPBP		STRBP	TIMP1
		KSR1							DDX58	CTAG2		LGMN	PPP1R16B		STX3	TMEM184C
		KYNU							DDX60L	CTH		LILRB4	PRDM1		SYTL2	TMSB4X
		LDLRAD4							DEFB1	CTSA		LIMA1	PRXL2A		SYTL3	TNF
		LGALS1							DENND5A	CTSB		LMNA	PSAP		TANC2	TNFRSF10B
		LGALS2							DEPP1	CTSC		LRCH1	PSTPIP2		TBC1D4	TNFRSF9
		LIMA1							DGKH	CTSG		LRMP	PTP4A3		TBC1D8	TOMM40
		LMNA							DHRS3	CTSK		LRRK2	PTPRS		TBCEL	TPPP3
		LPL							DHRS9	CTSW		LSAMP	RAB11FIP1		TC2N	TPST1
		LRRK2							DHX34	CTSZ		LSP1	RAB3IL1		TCOF1	TRAF3IP3
		LSP1							DIXDC1	CTTN		LTA4H	RALA		TCTN3	TRERF1
		LTB							DLC1	CTTNBP2NL		LY6E	RANBP2		TENT5C	TXNDC11
		LTC4S							DNAH2	CXADR		LYPD3	RAPGEF2		TESK2	UAP1
		LY6E							DNAJA1	CXCL1		LYVE1	RAPH1		TEX14	UBASH3B
		LYPD3							DNAJB1	CXCL13		LYZ	RDX		THADA	UBTD2
		LYZ							DNAJB4	CXCL14		MALT1	RFTN1		THBS1	UCK2
		MAFB							DNAJC5B	CXCL2		MAP4K4	RFX2		TIAM1	USP37
		MALT1							DOCK11	CXCL5		MB21D2	RGL1		TIMP1	VCAM1
		MANF							DOCK3	CXCL8		MCEMP1	RGPD1		TMEM131L	VIM
		MAP4K4							DOCK4	CXCL9		ME1	RHOB		TMSB4X	WDR74
		MAPRE2							DPF3	CYB5A		MEF2C	RHOC		TNF	WWOX
		MARCKSL1							DPYS	CYP1B1		MERTK	RIN2		TNFRSF10D	XCL1
		MATK							DRAM1	CYP20A1		MET	RIPOR2		TNFRSF18	XCL2
		MB21D2							DST	CYP27A1		MGST3	RNF122		TNFSF8	YES1
		MCF2L2							DTNA	CYP7B1		MMP7	RNF144B		TOB1	YWHAH
		MGLL							DUSP16	CYSLTR2		MN1	RNF19B		TOX2	ZBTB2
		MGST1							DUSP4	DAAM2		MNDA	RPS23		TPPP3	ZEB1
		MIS18BP1							DUSP6	DAB2		MOB1B	RRP12		TRAF1	ZFX
		MKI67							DUT	DACH1		MOB3B	RUBCN		TRAF3IP3	ZNF10
		MOB3B							E2F8	DAPP1		MRC1	S100A10		TRERF1
		MRC1							EDA	DBF4B		MRPS6	S100A11		TSHZ2
		MRPS6							EEPD1	DBI		MS4A4A	S100A9		TSPO
		MS4A4A							EGR1	DBT		MSMO1	SASH1		TTC39B
		MSMO1							EGR2	DCN		MSR1	SCGB1A1		TUBA1A
		MSR1							EIF2AK3	DDX58		MT1X	SCGB3A1		TUBB
		MT1E							EIF4A3	DDX60L		MT2A	SDC2		TXK
		MT1G							ELOVL7	DEFB1		MTSS1	SERPINA1		UBASH3B
		MT2A							EMP1	DENND4C		MYC	SESN2		UBTD2
		MX1							ENOX1	DENND5A		MYL6B	SGMS2		USP37
		MYC							ENPP3	DEPP1		MYO1E	SGPP1		USP53
		NAMPT							EPAS1	DGKH		MYOF	SH2D1B		UVRAG
		NARS2							EPB41L1	DHRS3		NAMPT	SH3PXD2B		VCL
		NAV1							EPB41L4A	DHRS9		NARS2	SH3RF3		VIM
		NCALD							EPB41L5	DHX34		NAV1	SIPA1L3		WDR59
		NDC80							EPN2	DIP2C		NCALD	SLAMF1		YBX1
		NDRG1							EPSTI1	DNAAF1		NDUFS3	SLAMF7		YES1
		NDUFS3							EREG	DNAH5		NEBL	SLC10A1		YWHAH
		NEDD9							ERO1B	DNAH6		NEDD9	SLC16A10		ZBTB16
		NEK1							ERRFI1	DNAJA1		NEK1	SLC20A1		ZBTB44
		NET1							ESCO2	DNAJA4		NFAM1	SLC7A11		ZC3HAV1
		NFE2L3							ETV3	DNAJB1		NFE2L3	SLC8A1		ZEB1
		NFIA							ETV7	DNAJC5B		NFKB1	SMAD3		ZFX
		NFKB1							EXT1	DNASE2B		NFKBIA	SMPDL3A		ZNRF1
		NFKBIA							EZH2	DNM1		NFKBID	SNTB1
		NFKBID							FABP3	DOCK11		NID1	SNX10
		NHSL1							FABP4	DOCK4		NKG7	SNX9
		NKD1							FABP5	DOK7		NLRP3	SOD2
		NKG7							FADS1	DOP1B		NR1H3	SOX4
		NLRP3							FADS2	DPYSL3		NR4A3	SPARC
		NMB							FAM110B	DRAM1		NRP1	SPOCK1
		NPHP4							FAM111B	DST		NUPR1	SPP1
		NR4A1							FAM117B	DTNA		OSBPL8	SQSTM1
		NR4A3							FAM13A	DTYMK		OSM	SRGAP2B
		NRP1							FAM168A	DUSP16		OTUD1	SSBP3
		OAS1							FAM20C	DUSP4		P3H2	ST8SIA4
		OSBPL3							FAM3B	DUSP6		PADI2	STARD13
		OSBPL8							FAM89A	DUT		PADI4	STAT4
		OSM							FARP1	DYSF		PAK1	STK38L
		OTUD1							FARP2	E2F1		PAM	STXBP2
		P2RX7							FBLIM1	EBF1		PAPSS2	SULF2
		PADI2							FBN1	EBI3		PARP16	SYAP1
		PAG1							FBP1	ECE1		PARP8	SYTL3
		PALD1							FBXL2	EDA		PC	TANC2
		PAPOLG							FCGR1A	EEPD1		PCBP3	TBC1D2
		PC							FCGR2B	EGLN1		PDE3B	TBC1D9
		PDE3B							FCGR3A	EGR1		PDE4D	TCF4
		PDE7B							FCHSD2	EGR2		PELI1	TENT4B
		PDK4							FCN1	EIF2AK3		PFKFB3	TEX14
		PDLIM4							FDX1	ELANE		PHLDA1	TFRC
		PEBP1							FER	ELOVL7		PHLDA2	THBS1
		PELI1							FGD2	EML6		PKP2	TIMP1
		PFKFB3							FGD4	EMP1		PLA2G4A	TLR4
		PID1							FGD5	EMP2		PLAC8	TMEM184C
		PIM2							FGF10	ENPP2		PLCB1	TMEM232
		PKP2							FGF18	ENTPD7		PLCG2	TMEM51
		PLBD1							FGFR1	EPB41L1		PLD3	TMEM52B
		PLEK							FHIT	EPB41L2		PLEK	TMSB4X
		PLEKHA5							FHL1	EPB41L5		PLEKHA5	TMX4
		PLEKHG2							FLNB	EPHB1		PLEKHG1	TNFAIP6
		PLEKHO1							FMNL2	EPHX2		PLPP3	TNFRSF21
		PLIN2							FN1	EPS8		POLB	TNIK
		PLK1							FNDC3A	EPSTI1		POLDIP3	TNNT1
		PLPP3							FNIP2	EREG		PPARG	TOB1
		PLXNA2							FOLR1	ERO1B		PPBP	TPPP3
		PLXNC1							FOLR3	ERRFI1		PRDM1	TPST1
		PMAIP1							FOXK2	ESCO2		PRDX1	TRAF1
		POLB							FOXO1	ESR2		PRKCA	TREM1
		POLE2							FPR2	ETV3		PSAP	TRERF1
		PON2							FRMD4A	EVL		PSME4	TSC22D1
		PPARG							FTH1	EXT1		PSTPIP2	TSPO
		PPBP							FTL	EZH2		PTGDS	TSPYL2
		PPP1R16B							FUCA1	F11		PTPRS	TTYH2
		PRC1							FXR2	F13A1		RAB11FIP1	TUBA1A
		PRDM1							FYN	F3		RAB13	UBASH3B
		PRKAR2B							G0S2	FABP3		RAB7A	UGCG
		PSAP							GADD45A	FABP4		RALA	USP36
		PTGS2							GADD45B	FABP5		RANBP2	USP37
		PTMS							GALM	FADS2		RAPGEF2	USP6NL
		PTPRS							GAN	FAIM		RAPH1	UST
		PTTG1							GAPDH	FAM110B		RASAL2	UVRAG
		RAB11FIP1							GART	FAM111B		RASGRP3	VAMP5
		RAB13							GAS2L3	FAM117B		RFTN1	VAV2
		RAB3IL1							GAS7	FAM126A		RFX2	VDR
		RALA							GATA3	FAM13A		RGPD1	VIM
		RAMP1							GBE1	FAM160A1		RGS1	VSIG4
		RASAL2							GBP1	FAM168A		RGS13	WDR59
		RBP4							GBP3	FAM20C		RGS2	WDR74
		RFX2							GBP5	FAM3B		RHOB	XYLT1
		RGS13							GCH1	FAM89A		RHOH	YBX1
		RGS2							GCLM	FBP1		RIN2	ZBTB16
		RHOB							GCNT2	FBXO45		RIPOR2	ZBTB46
		RHOC							GDA	FCAR		RNASE1	ZC3H12C
		RHOH							GDF11	FCER1A		RNASE2	ZFX
		RIN2							GDF15	FCER2		RNF175	ZNF331
		RNASE2							GEM	FCGR1A		RPS23	ZNRF1
		RNF144B							GFOD1	FCGR2B		RRP12
		RNF19B							GGH	FCGR3A		RUBCN
		RRP12							GINS2	FCHO1		RUNX3
		RTN1							GIPC1	FCHO2		S100A10
		RUBCN							GK	FCHSD2		S100A9
		RUBCNL							GLIS3	FCN1		S100B
		RUNX2							GLT1D1	FDFT1		SARNP
		RUNX3							GLUD1	FDX1		SASH1
		S100A10							GLUL	FER		SCGB1A1
		S100A11							GM2A	FGD2		SCGB3A1
		S100A8							GNAI1	FGD4		SDC2
		S100A9							GNG11	FGD5		SDC4
		S100B							GOLIM4	FGF13		SECTM1
		SCCPDH							GOLM1	FGF18		SERPINA1
		SCGB1A1							GPA33	FGFR1		SERPINB5
		SCGB3A1							GPAT3	FGL2		SERPINB9
		SDC2							GPC4	FHIT		SERPING1
		SDC4							GPC5	FILIP1L		SFTPA1
		SDF2L1							GPC6	FLNB		SFTPA2
		SECTM1							GPR137B	FLT1		SFTPC
		SEMA4A							GPX3	FLT3		SGIP1
		SERPINB9							GRIP2	FLVCR2		SGK1
		SERPING1							GRK5	FMN1		SGMS2
		SFTPA1							GRN	FMNL2		SGPP1
		SFTPA2							GSTO2	FN1		SH3BP4
		SFTPC							GTF2IRD1	FNDC3A		SH3PXD2B
		SGK1							GTSE1	FNIP2		SIGLEC10
		SGMS2							GYS1	FOLR1		SIPA1L3
		SH3BP4							HAUS6	FOLR3		SLAMF1
		SH3PXD2B							HBEGF	FOXK2		SLC16A10
		SH3RF3							HECTD1	FOXO1		SLC16A6
		SIGLEC10							HERPUD1	FRMD4A		SLC1A3
		SIPA1L3							HES4	FRY		SLC25A37
		SLAMF1							HEY1	FSTL3		SLC27A4
		SLC19A2							HIP1	FTH1		SLC2A3
		SLC1A3							HIVEP1	FTL		SLC31A1
		SLC20A1							HIVEP2	FYN		SLC7A11
		SLC27A4							HLA-DMB	G0S2		SLC7A8
		SLC2A1							HLA-DPA1	GAB1		SMAD3
		SLC2A3							HLA-DPB1	GADD45A		SMOX
		SLC7A11							HLA-DQB2	GADD45B		SMPDL3A
		SMAD3							HLA-DRA	GAL		SMPDL3B
		SMOX							HLA-DRB1	GALM		SNAI1
		SNAP23							HLA-DRB5	GAPDH		SNAPC1
		SNX9							HMG20B	GART		SNX10
		SOD2							HMGA1	GAS2L3		SNX9
		SORT1							HMGB2	GAS7		SOD2
		SPDYA							HMGB3	GBP1		SPARC
		SPP1							HMGCS1	GBP3		SPATS2L
		SQSTM1							HMGN2	GBP5		SPON2
		SRGAP2B							HMMR	GCH1		SPP1
		ST6GAL1							HMOX1	GCHFR		SPRY1
		ST6GALNAC3							HNF1A	GCLC		SPSB1
		STAT4							HOMER1	GCLM		SQSTM1
		STK38L							HOMER2	GCNT2		SRGAP1
		STMN1							HOXA3	GDF11		SRGAP2B
		STRBP							HP	GDF15		SSBP2
		STX3							HPGDS	GEM		SSBP3
		SYNJ2							HRH1	GFOD1		ST6GALNAC3
		TACSTD2							HS3ST3B1	GGH		ST8SIA4
		TANC2							HSD11B1	GINS2		STARD13
		TBC1D9							HSP90AA1	GIPC1		STAT4
		TCF4							HSP90B1	GJB2		STK38L
		TCOF1							HSPA1A	GLDC		STX3
		TENT4B							HSPA5	GLIS3		STXBP2
		TESK2							HSPB1	GLUD1		SULF2
		TGFBI							HSPD1	GLUL		SVIL
		THBS1							HSPH1	GM2A		SYAP1
		TIAM1							HTRA4	GNG2		SYTL3
		TIMP1							ICA1	GNG4		TBC1D2
		TK1							ICOS	GNG7		TBC1D8
		TMEM184C							ID2	GOLIM4		TCF4
		TMEM51							ID3	GOLM1		TCF7L2
		TMEM52B							IDH1	GPAT3		TCOF1
		TMSB4X							IDO1	GPC4		TCTN3
		TMX4							IER2	GPC5		TENT4B
		TNF							IER5	GPC6		TEX14
		TNFSF8							IFI27	GPD1		TFPI
		TOP2A							IFI44L	GPR183		TFRC
		TPD52							IFITM2	GPRC5A		TGFB2
		TPPP3							IFITM3	GPX3		THBS1
		TPST1							IFNLR1	GRAMD1B		THRB
		TPX2							IFRD1	GRAMD2B		TIAM1
		TRAF1							IGFBP2	GRB10		TIMP1
		TREM1							IGFBP6	GRN		TJP2
		TREM2							IGLL5	GSN		TKTL1
		TSPAN15							IGSF6	GTF2IRD1		TMSB4X
		TSPO							IL12RB1	GYS1		TMX4
		TYMS							IL15	GZMA		TNFRSF10D
		UAP1							IL17RB	GZMB		TNFRSF21
		UBASH3B							IL18R1	HAMP		TNFSF8
		UBE2C							IL1R2	HAUS2		TNNT1
		UGCG							IL1RN	HAUS6		TPPP3
		USP37							IL6	HBB		TPST1
		USP54							IL7R	HCK		TRAF1
		UST							INPP5A	HDAC9		TREM1
		VDR							INSIG1	HEATR5B		TRERF1
		VIM							INTS6	HECTD1		TRIM69
		VSIG4							IQCN	HERC5		TSPYL2
		WDR59							IQGAP3	HERPUD1		TTYH2
		WDR74							IRAK2	HES1		TUBA1A
		YBX1							IRF8	HES4		TUBB
		YES1							ISG15	HEXB		TWISTNB
		YWHAH							ITGAD	HEY1		TXNDC16
		ZBTB16							ITGB4	HIP1		UBASH3B
		ZC3H12C							ITGB5	HIVEP1		USP36
		ZFYVE16							JAKMIP2	HIVEP2		USP37
		ZNF704							JAML	HLA-DMB		USP6NL
		ZNRF1							JARID2	HLA-DPA1		UST
									JCHAIN	HLA-DPB1		UVRAG
									JMY	HLA-DQA1		VAMP5
									JSRP1	HLA-DQB1		VAV2
									JUN	HLA-DQB2		VCAN
									KANK1	HLA-DRA		VIM
									KAZN	HLA-DRB1		VSIG4
									KCNA2	HLA-DRB5		WDR59
									KCNAB1	HMG20B		WDR74
									KCNE1	HMGA1		WIPI2
									KCNJ2	HMGB2		XYLT1
									KCNMA1	HMGCS1		YES1
									KDM2B	HMGN2		YWHAH
									KIF14	HMMR		ZBTB16
									KIF16B	HMOX1		ZC3H12C
									KIF18B	HOPX		ZFX
									KIF20A	HOXA3		ZFYVE16
									KIF26B	HP		ZNF10
									KIF2C	HPGDS		ZNF331
									KLHDC8B	HRH1		ZNRF1
									KLHL15	HRK
									KLHL25	HS3ST2
									KLHL29	HS3ST3B1
									KLRD1	HSD11B1
									KLRG1	HSD3B7
									KNL1	HSH2D
									KPNA2	HSP90AA1
									KRT17	HSP90B1
									KSR1	HSPA1A
									KYNU	HSPB1
									LAMB1	HSPD1
									LARGE1	HSPG2
									LDLR	HSPH1
									LDLRAD4	HTRA1
									LGALS1	HTRA4
									LGALS3	ICA1
									LGALS3BP	ID2
									LGMN	ID3
									LGR4	IDH1
									LILRB4	IDO1
									LIMA1	IER3
									LINGO2	IER5
									LMCD1	IFI27
									LMNA	IFI44L
									LONRF3	IFIT1
									LPAR1	IFIT2
									LPAR3	IFIT3
									LPL	IFITM2
									LRIG1	IFITM3
									LRRC23	IFNLR1
									LRRK2	IFT122
									LSAMP	IGF1R
									LSP1	IGFBP2
									LTA4H	IGFBP6
									LY6E	IGLL5
									LYPD3	IGSF6
									LYZ	IKZF2
									MACC1	IKZF3
									MAD2L1	IL10
									MAEL	IL18R1
									MAFB	IL1A
									MALT1	IL1B
									MAML3	IL1R1
									MANF	IL1R2
									MAP3K7CL	IL1RL1
									MAP4K4	IL1RN
									MARCKS	IL6
									MAST4	IL7R
									MATK	INPP5A
									MB21D2	INPP5F
									MCEMP1	INSIG1
									MCF2L2	INSR
									MCM7	INTS6
									MCTP2	IQCN
									MDC1	IQGAP3
									MDK	IRAK2
									MDM2	IRF4
									ME1	IRF8
									MELK	ISG15
									MFHAS1	ITGA6
									MFSD14B	ITGA7
									MGAT3	ITGB1BP1
									MGLL	ITGB3
									MGST1	ITGB5
									MGST3	ITGB8
									MITF	ITM2C
									MKI67	JAKMIP2
									MLPH	JAML
									MME	JARID2
									MMP10	JMY
									MMP2	JUN
									MMP7	KAZN
									MMP9	KCNA2
									MND1	KCNE1
									MNDA	KCNJ15
									MOB3B	KCNJ2
									MPC2	KCNMA1
									MRC1	KDM2B
									MREG	KEL
									MRPS33	KHDRBS3
									MRPS6	KIF16B
									MS4A4A	KIF18A
									MS4A5	KIF26B
									MSMO1	KLHL25
									MSR1	KLHL6
									MT1G	KLK4
									MT2A	KLRD1
									MTBP	KLRG1
									MTUS2	KPNA2
									MX1	KRT17
									MXD3	KRT5
									MYC	KSR1
									MYL6B	KYNU
									MYL9	LARGE1
									MYLIP	LDHC
									MYO1D	LDLR
									MYO1E	LDLRAD4
									MYO6	LGALS1
									NAALAD2	LGALS2
									NAF1	LGALS3
									NARS2	LGALS3BP
									NAV1	LGMN
									NCALD	LIF
									NCAPH	LILRB4
									NCEH1	LIMA1
									NDC80	LINGO2
									NDRG1	LMCD1
									NDUFS3	LMNA
									NEDD4L	LPL
									NEK1	LRCH1
									NEK2	LRMP
									NELFCD	LRPAP1
									NET1	LRRC23
									NFAM1	LRRK2
									NFATC2	LSAMP
									NFE2L3	LSP1
									NFKB1	LTA4H
									NFKBIA	LTB
									NLRP3	LTC4S
									NNMT	LY6E
									NOP10	LYPD3
									NPHS1	LYZ
									NR4A3	LZTS1
									NRIP1	MACC1
									NRP1	MAD2L1
									NRP2	MAFB
									NRXN3	MALT1
									NUF2	MAML3
									NUPR1	MANF
									NUSAP1	MAP3K13
									OAS1	MAP4K4
									OASL	MAPRE2
									OPRK1	MARCKS
									OSBPL10	MATK
									OSBPL11	MB21D2
									OSBPL1A	MCEMP1
									OSBPL3	MCF2L2
									OSBPL8	MCTP2
									OSM	MDC1
									OTUD1	MDK
									P2RX1	MDM2
									P2RX7	MED12L
									P4HA1	MEF2C
									PADI2	MERTK
									PALLD	MET
									PAPLN	METTL7B
									PAPSS2	MFHAS1
									PAQR5	MGAM
									PARP8	MGLL
									PC	MGST1
									PCBP3	MGST3
									PCNA	MIS18BP1
									PCSK5	MITF
									PDE3B	MKI67
									PDE7B	MLKL
									PDGFC	MLPH
									PDK1	MME
									PDK4	MMP1
									PDLIM1	MMP10
									PDLIM4	MMP12
									PEBP1	MMP2
									PEBP4	MMP7
									PELI1	MMP9
									PFKFB3	MN1
									PHGDH	MND1
									PHLDA1	MNDA
									PHLDA3	MOB3B
									PHLDB2	MPC2
									PHTF1	MPP6
									PID1	MPZL3
									PIM2	MRC1
									PIMREG	MREG
									PKD2L1	MRPS33
									PKP2	MRPS6
									PLA2G4A	MS4A4A
									PLA2G7	MS4A5
									PLAC8	MSLN
									PLAC9	MSMO1
									PLBD1	MSR1
									PLCG2	MT1E
									PLD3	MT1F
									PLEKHG2	MT1G
									PLIN2	MT1H
									PLK1	MT1M
									PLPP1	MT1X
									PLPP3	MT2A
									PLSCR2	MTO1
									PLTP	MTSS1
									PLXNA2	MUCL1
									PMAIP1	MX1
									PMP2	MYB
									PMP22	MYC
									POLB	MYL6B
									POLG2	MYL9
									PON2	MYLIP
									POSTN	MYO1D
									PPARG	MYO1E
									PPBP	MYO6
									PPIC	MYOF
									PPP1R13B	NAALAD2
									PPP2R3A	NAMPT
									PRAG1	NARS2
									PRC1	NAV1
									PRDX1	NAV2
									PRDX4	NCALD
									PRIMPOL	NCAM1
									PRMT9	NCAPH
									PROCR	NCEH1
									PRR11	NCF1
									PRXL2A	NCKAP5
									PSD3	NCKAP5L
									PSME4	NCS1
									PTGDS	NDP
									PTGS2	NDRG1
									PTMS	NDUFS3
									PTPN13	NEBL
									PTPRM	NEDD4L
									PTPRS	NEFL
									PTTG1	NEK1
									PTX3	NELFCD
									PUS10	NELL2
									PVR	NET1
									RAB11FIP1	NFAM1
									RAB3A	NFE2L3
									RAB7A	NFIA
									RAB7B	NFKB1
									RAD51	NFKBIA
									RAD51AP1	NFKBID
									RALA	NHSL1
									RANBP2	NID1
									RAPGEF2	NKG7
									RAPH1	NKX3-1
									RASAL2	NLRP3
									RASGRP3	NMB
									RASSF8	NNMT
									RBP4	NOP10
									RDX	NPAS2
									REEP3	NR1H3
									RETN	NR4A1
									RETREG1	NR4A3
									RFX2	NRIP1
									RGPD1	NRP1
									RGS1	NRXN3
									RGS12	NUPR1
									RGS13	OAS1
									RHCG	OFD1
									RHOB	OPN3
									RHOC	ORAI1
									RHOH	OSBPL10
									RIN2	OSBPL1A
									RIPOR2	OSBPL3
									RMDN3	OSBPL8
									RNASE1	OSM
									RNASE2	OTUD1
									RNASE6	P2RX7
									RND3	P2RY14
									RNF144B	P2RY8
									RNF175	P3H2
									ROCK2	P4HA1
									RPS23	PADI2
									RRM2	PAK1
									RRP12	PALD1
									RSPO3	PALLD
									RUVBL2	PAM
									RYR2	PAPLN
									S100A10	PAPOLG
									S100A11	PAPSS2
									S100A13	PAQR5
									S100A16	PARP8
									S100A8	PC
									S100A9	PCBP3
									S100B	PCDH9
									S100P	PCED1B
									SAMD12	PCNA
									SAMD3	PCSK1N
									SAMD4A	PCSK5
									SARNP	PDE3B
									SASH1	PDE4D
									SCCPDH	PDGFC
									SCD	PDK1
									SCGB1A1	PDK4
									SCGB3A1	PDLIM1
									SDC2	PDLIM4
									SDC4	PEBP1
									SEC11C	PELI1
									SECTM1	PFAS
									SEMA3C	PFKFB3
									SEMA4A	PGAP1
									SERPINA1	PGM1
									SERPINB5	PHGDH
									SERPINB9	PHLDA1
									SERPINF1	PHLDA3
									SERPING1	PHTF1
									SFTPA1	PID1
									SFTPA2	PIF1
									SFTPC	PIK3CG
									SGK1	PIM2
									SGMS2	PIMREG
									SGPP1	PKP2
									SH3BP4	PLA2G7
									SH3PXD2A	PLAC9
									SH3PXD2B	PLAU
									SH3RF3	PLBD1
									SHCBP1	PLCB1
									SHROOM3	PLCG2
									SIGLEC10	PLEKHA5
									SIK2	PLEKHG2
									SIPA1L3	PLEKHO1
									SKAP1	PLIN2
									SLA2	PLK1
									SLC16A10	PLOD2
									SLC16A6	PLPP3
									SLC19A3	PLTP
									SLC1A3	PLXNC1
									SLC20A1	PMAIP1
									SLC25A18	POLB
									SLC25A44	POLG2
									SLC27A4	PON2
									SLC2A3	POSTN
									SLC31A1	PPA1
									SLC47A1	PPARG
									SLC48A1	PPBP
									SLC7A11	PPIC
									SLC8A2	PPP1R13B
									SLC9A7	PPP1R14C
									SMAD3	PPP1R16B
									SMC2	PPP2R3A
									SMOX	PRAG1
									SMPDL3B	PRDM1
									SNAI1	PRDX1
									SNAP23	PRDX4
									SNAPC1	PRIMPOL
									SNED1	PRKAR2B
									SNRNP25	PRKCA
									SNTB1	PRKCG
									SNX2	PRKX
									SNX9	PRMT9
									SOD2	PROC
									SORBS1	PROCR
									SORT1	PRPS2
									SPARC	PRPSAP2
									SPATS2L	PRR16
									SPC24	PRSS21
									SPC25	PRSS3
									SPDYA	PRXL2A
									SPOCD1	PSAT1
									SPP1	PSD3
									SPSB1	PSME4
									SPSB2	PSTPIP2
									SPTBN4	PTGDS
									SPTLC3	PTGS2
									SRGAP1	PTMS
									SRGAP2B	PTPN22
									SRSF12	PTPRS
									SSBP2	PTX3
									SSBP3	PUS10
									ST3GAL6	PVALB
									ST6GALNAC3	QRICH2
									STAC	RAB11FIP1
									STARD13	RAB13
									STAT4	RAB3IL1
									STK38L	RAB7A
									STMN1	RAB7B
									STOM	RAD51AP1
									STON1	RALA
									STON2	RALGPS2
									STRBP	RAMP1
									STX3	RANBP2
									STXBP2	RAP1GAP2
									SUGCT	RAPGEF2
									SV2B	RAPH1
									SVIL	RASAL2
									SYAP1	RASGRP3
									SYCP2L	RBFOX3
									SYNGR1	RBP4
									SYNJ2	RDX
									SYTL3	RECK
									TACSTD2	REEP3
									TANC2	RETN
									TBC1D2	RETREG1
									TBC1D4	RFX2
									TBC1D8	RGL1
									TBC1D9	RGPD1
									TBX20	RGS13
									TCF19	RGS16
									TCF7L2	RGS2
									TCOF1	RGS20
									TDRD3	RHCG
									TEC	RHOB
									TENM4	RHOC
									TENT4B	RHOH
									TENT5A	RIN2
									TESK2	RIPOR2
									TEX14	RMDN3
									TFCP2L1	RMND1
									TFDP2	RNASE2
									TFF2	RNASE6
									TFRC	RND3
									TGFBI	RNF125
									TGM2	RNF144B
									THBD	RNF175
									THBS1	RNF19B
									THRB	RNLS
									TIAM1	RRM2
									TIMP1	RRP12
									TJP1	RSAD2
									TJP2	RTN1
									TK1	RUBCNL
									TKTL1	RUNX2
									TMEM106C	RUNX3
									TMEM131L	RUVBL2
									TMEM176A	RYR2
									TMEM176B	S100A10
									TMEM184C	S100A11
									TMEM51	S100A13
									TMEM52B	S100A16
									TMSB4X	S100A8
									TMTC2	S100B
									TMX4	S100P
									TNF	SAMD4A
									TNFAIP6	SARNP
									TNFRSF10D	SASH1
									TNFRSF21	SCARB1
									TNIK	SCCPDH
									TNNI2	SCG5
									TNNT1	SCGB1A1
									TNS3	SCGB3A1
									TOB1	SCIN
									TOP2A	SDC2
									TPD52	SDC4
									TPPP3	SDF2L1
									TPST1	SDK1
									TPX2	SEC11C
									TREM2	SECTM1
									TRHDE	SEL1L3
									TROAP	SEMA3C
									TSPO	SEMA4A
									TSPYL2	SERPINA1
									TTC39B	SERPINB10
									TUBA1A	SERPINB2
									TUBB	SERPINB5
									TULP2	SERPINB9
									TVP23A	SERPINE1
									TXN	SERPING1
									TXNDC11	SERPINH1
									TYMS	SESN2
									UAP1	SFTPA1
									UBASH3B	SFTPA2
									UBE2C	SFTPC
									UBE2T	SGCD
									UBTD2	SGIP1
									UCHL1	SGK1
									UGCG	SGMS2
									USP36	SH3BP4
									USP37	SH3PXD2A
									USP54	SH3RF3
									USP6NL	SHOX2
									UST	SHROOM3
									VAMP5	SIGLEC10
									VAV2	SIPA1L3
									VCAN	SLAMF1
									VCL	SLC10A1
									VDR	SLC12A8
									VGLL3	SLC16A1
									VIL1	SLC16A10
									VIM	SLC19A2
									VSIG4	SLC1A3
									WDFY4	SLC20A1
									WDR59	SLC25A37
									WDR74	SLC27A4
									WWOX	SLC2A3
									YBX1	SLC31A1
									YES1	SLC38A1
									YWHAH	SLC41A2
									ZBTB16	SLC47A1
									ZBTB2	SLC7A11
									ZBTB44	SLC7A8
									ZBTB46	SLC8A1
									ZBTB7C	SLC8A2
									ZC3H12C	SLC9A1
									ZC3HAV1	SLCO5A1
									ZFX	SMAD3
									ZFYVE16	SMC2
									ZNF10	SMOX
									ZNF331	SMPDL3A
									ZNF804A	SNAI1
									ZNF891	SNAP23
									ZNRF1	SNAPC1
									ZWINT	SNRNP25
										SNX10
										SNX2
										SNX9
										SOD2
										SORT1
										SPARC
										SPATS2L
										SPC24
										SPECC1
										SPOCD1
										SPON2
										SPP1
										SPRED1
										SPSB2
										SPTBN1
										SQSTM1
										SRGAP1
										SRGAP2B
										SRSF12
										SSBP2
										SSBP3
										ST3GAL6
										ST6GAL1
										ST6GALNAC3
										ST8SIA4
										STAC
										STARD13
										STAT4
										STEAP1
										STK38L
										STMN1
										STRBP
										STX3
										STXBP2
										SULF2
										SULT1C2
										SV2B
										SVIL
										SYAP1
										SYCP2L
										TACSTD2
										TAF4B
										TANC2
										TATDN1
										TBC1D4
										TBC1D8
										TBC1D9
										TBX20
										TCEAL9
										TCF4
										TCF7L2
										TCOF1
										TCTN3
										TDO2
										TDRD3
										TDRD6
										TEC
										TENM4
										TENT4B
										TENT5A
										TEX14
										TFCP2L1
										TFDP2
										TFPI
										TFRC
										TGFBI
										TGM2
										THADA
										THBD
										THBS1
										THRB
										TIAM1
										TIMP1
										TIMP3
										TINAGL1
										TJP1
										TJP2
										TK1
										TKTL1
										TLR4
										TMC5
										TMEM106C
										TMEM131L
										TMEM176A
										TMEM184C
										TMEM51
										TMSB4X
										TMX4
										TNFAIP6
										TNFRSF10B
										TNFRSF10D
										TNFRSF18
										TNFRSF21
										TNFRSF8
										TNFSF10
										TNFSF14
										TNFSF8
										TNIP3
										TNNI2
										TNNT1
										TNS3
										TOB1
										TOMM40
										TPM2
										TPPP3
										TPST1
										TRAF1
										TREM1
										TREM2
										TRERF1
										TRIM69
										TRIM72
										TSPAN15
										TSPAN4
										TSPO
										TSPYL2
										TTC28
										TTC39B
										TTYH2
										TUBA1A
										TUBB
										TULP2
										TXN
										TXNDC11
										TXNDC5
										UAP1
										UBASH3B
										UBE2C
										UBE2T
										UCHL1
										UCK2
										USP13
										USP2
										USP36
										USP37
										USP53
										USP6NL
										USPL1
										UST
										UTP6
										VAMP5
										VAT1
										VAV2
										VAX2
										VCAN
										VCL
										VIM
										VSIG4
										VSNL1
										WDFY4
										WDR59
										WDR66
										WDR74
										WWOX
										XYLT1
										YBX1
										YES1
										YWHAH
										ZBTB16
										ZBTB44
										ZBTB46
										ZBTB7C
										ZC3H12C
										ZC3H3
										ZC3HAV1
										ZFAND2A
										ZFX
										ZFY
										ZFYVE16
										ZNF10
										ZNF331
										ZNF804A
										ZNRF1
										ZWINT

## Sheet: MRF_IntAct
B Cell	B Plasma	Dendritic_A	Dendritic_B	Dendritic_C	Dendritic_Langerhans	Dendritic_Plasmacytoid	Innate_lymphoid_A	Innate_lymphoid_B	Macrophage	Macrophage_Alveolar	Mast	Monocyte	Monocyte_Non_Classical	NK	T	T_Cytotoxic	T_Regulatory
ABCA1	ACTB	A2M	ABCA6	ACACB	ACTB	ACACB	ACTB	ACTB	A2M	A2M	ATAD1	ABCA1	ABCA1	A2M	A2M	A2M	ACTB
ABHD3	AFF3	ABCA1	ACTB	ACTB	AHNAK	ACTB	AREG	CHN2	A4GALT	AASS	BEX3	ABHD17C	ABHD17C	ABCA1	ABTB2	ABLIM1	APOBEC3C
ACTB	ARHGAP24	ABCC4	AHNAK	ADAM28	AQP3	ALDH1A1	CCL18	FN1	ABCA1	ABCA1	CRIP1	ABHD3	ABHD5	ACSL3	ACTB	ABTB2	BATF
AFF3	AURKB	ABHD17C	ANXA1	AHNAK	ARHGAP24	ALDH1A2	CCL5	LTB	ABCA6	ABCA6	LTC4S	ABHD5	ACKR3	ACTB	ADAM23	ACSL4	C1QA
AHNAK	BACH2	ACOT7	ANXA2	ALCAM	AVEN	ANXA1	CRIP1	PCDH9	ABCG2	ABCC4	MAOB	ABL1	ACTB	ADAMTS17	AHNAK	ACTB	C9orf16
ANK3	BCL2	ACSL3	AQP3	ANK3	CD207	AREG	CRYBG1	PPP1R16B	ABHD5	ABCG2	RGS16	ABTB2	ADAM28	ADCY9	AKAP6	ACYP2	CADM1
AP1B1	BCL7A	ACTB	AREG	ANKRD28	CPM	AZI2	CTSW	SCGB1A1	ABL1	ABHD17C	TINAGL1	ACOT7	ADAMTS17	ADGRG5	ALOX5AP	ADAMTS17	CALM3
APOC1	BIRC5	ADAM28	ATP2B4	ARHGAP10	CRIP2	BAIAP2	FN1	SCGB3A1	ABTB2	ABHD3		ACSL3	ADAMTS2	AHNAK	ANKRD26	AHNAK	CAMK1D
APOE	BLK	ADCY3	BCL2A1	ATP1B3	CYTH3	BCL2L11	HOPX	SFTPC	ACACB	ABHD5		ACSL4	ADCY3	AK5	ANKRD28	ALOX5AP	CAMK4
ARHGAP24	BUB1B	ADGRE2	BCR	BCAT1	DPF3	CCL18	ITM2C	TMSB4X	ACKR3	ABL1		ACTB	ADCY9	ANKRD28	ANXA1	ANK3	CCDC88A
ATF7IP2	CAMK2D	AFF3	CAMK1D	BCL2A1	DUSP6	CD80	LDLRAD4	VIM	ACO1	ACACB		ADAMTS17	ADGRB3	ANXA1	ANXA2	ANKRD28	CCL18
AUTS2	CCL18	AGPAT4	CCDC30	BICDL1	FCGBP	CENPU	LMNA		ACOT1	ACKR3		ADAMTS2	ADGRE2	APBA2	APBA2	ANXA1	CD177
BANK1	CD22	AHNAK	CCL18	CCL18	FN1	CENPW	LSP1		ACOX1	ACOT1		ADCY3	AHNAK	APOBEC3C	APOBEC3C	APBA2	CD69
BCAS2	CD79A	AKAP12	CD83	CD70	FUCA1	CERS4	MAPRE2		ACP2	ACOT13		ADCY9	ALDH1A1	APOC1	APOC1	APOBEC3C	CD7
BFSP2	CD79B	ALCAM	CD86	CD80	GBP1	CHIT1	NKG7		ACSM3	ACOT7		ADGRE2	ALDH1A2	APOE	APOE	APOC1	CD79A
BIRC3	CDK1	ALDH2	CHSY1	CD83	HK2	COL1A1	SCGB1A1		ACTB	ACP2		AHNAK	AMPD3	AREG	AREG	APOE	CHN1
BLK	CEP128	AMPD3	CPM	CD84	ITGB5	CPM	SCGB3A1		ACYP2	ACP5		ALCAM	AMPH	ATP1B3	ARHGAP10	AREG	CLNK
C1QA	CIT	ANK3	CRIP1	CD86	LARGE1	CPVL	SFTPC		ADAP1	ACSL4		ALDH1A1	ANKRD22	ATP2B4	ATF7IP2	ARHGAP10	COL19A1
C1QB	EBF1	ANKRD22	CRYBG1	CERS6	LIMA1	CRIP1	SLC2A3		ADCY3	ACTB		ALDH2	ANKRD28	AUTS2	ATP1B3	BAG3	CPE
C1QC	FN1	ANKRD28	CST3	CHKA	LMNA	CSTA	SPP1		ADIPOR2	ACYP2		AMPD3	ANXA1	BACH2	AUTS2	BCL11B	CRIP1
CARD11	GCSAM	ANLN	CSTB	CHSY1	LRRC23	CTSA	TMSB4X		ADTRP	ADAM12		AMPH	ANXA2	BCL2L11	BAG3	BCL2L11	EBI3
CARMIL1	HLA-DMB	ANXA1	CXCL2	CLIP2	LRRK2	CXADR	TRAF3IP3		AFDN	ADAM17		ANGPTL4	APOBEC3A	BNC2	BATF	BCR	FAM102A
CCL18	HLA-DPA1	ANXA2	CXCL8	CPM	MCEMP1	CXCR3	TRERF1		AGPAT4	ADAM28		ANKH	APOBEC3C	BTBD11	BCL11B	BFSP2	FN1
CD63	HLA-DPB1	AP1B1	DBI	CRIP1	MPP6	ECE1	TXK		AGPAT5	ADAMTS17		ANKRD22	AREG	C1QA	BCL2	BLVRB	GAPDH
CD70	HLA-DQA1	APOBEC3C	DNAJA1	CRYBG1	MYC	EEPD1	UBASH3B		AGRP	ADAMTS2		ANKRD28	ARSG	C1QB	BCL2L11	BTG2	ICA1
CD74	HLA-DQB1	AQP3	EMP1	CSGALNACT1	MYL9	EGR1	VIM		AHNAK	ADGRE2		ANXA1	ATF6	C1QC	BRCA2	C12orf75	IL12RB2
CD79A	HLA-DRA	AREG	FGD4	CST3	MYO6	EPS8			AHR	ADGRV1		APOBEC3A	ATP1B3	C9orf16	BTG2	C16orf54	ITM2A
CD83	HLA-DRB1	ARHGAP31	FN1	CXCL8	NKG7	EREG			AK5	ADIPOR2		AREG	ATP2C1	CAMK1D	BUB1B	C1orf21	LAIR2
CENPK	HLA-DRB5	ASGR1	FYN	DENND5A	NRN1	FARP1			AKAP12	AGPAT4		ARHGAP10	BACH2	CARD11	C12orf75	C1QA	LDLRAD4
CENPM	HMGA1	ATF3	HLA-DRB1	DNM1	PDK4	FCGR3A			AKR1B1	AGPAT5		ARMC8	BASP1	CASS4	C1QA	C1QB	LTB
CEP128	HMGB2	ATF6	HLA-DRB5	DRAM1	PELI1	FLVCR2			AKR1C1	AGRP		ARSG	BCAT1	CBLB	C1QB	C1QC	MB21D2
CERS4	HMGN2	ATP2B4	HSP90AA1	EPHX2	PFAS	FN1			AKR1C2	AHNAK		ASGR1	BCL2A1	CCL18	C1QC	C9orf16	MT2A
CHCHD10	IGF2BP3	ATP2C1	HSPA1A	ETV3	PLAU	FUCA1			AKR1C3	AIFM1		ATF3	BCL2L11	CCL20	C9orf16	CALM3	NAMPT
CHI3L1	IRF8	AURKB	IFITM2	EZH2	PRKAR2B	FXR2			ALAS1	AKAP12		ATF6	BLOC1S2	CCL3	CALM3	CAMK1D	PCSK1N
CLIC4	ITPKB	AUTS2	KSR1	FGD4	PTPRM	GLUL			ALDH1A1	AKAP6		ATP1B1	BRCA2	CCL5	CAMK1D	CAPG	PDE7B
CMSS1	KLF12	AVPI1	LDLRAD4	FN1	RAPH1	HAUS2			ALDH1A2	AKR1B1		ATP1B3	BSG	CD247	CAMK2D	CARD11	PPP1R16B
CNR1	LTB	AXL	LGALS1	FRMD4A	RNLS	HBEGF			ALDH2	AKR1C1		ATP2C1	BTBD11	CD3D	CAPG	CBLB	RHOC
CRYBG1	MAPRE2	AZI2	LGALS2	GAB1	RUBCN	HK2			ALG13	AKR1C2		AUTS2	C15orf48	CD3G	CARD11	CCL18	RIPOR2
CST3	MARCKSL1	BAG3	LIMA1	GCNT2	S100A10	HSPA5			ALG9	AKR1D1		AVPI1	C1QA	CD69	CASS4	CCL3	SCGB1A1
CXCL8	MELK	BASP1	LMNA	GPC5	SCCPDH	HSPG2			ALK	ALCAM		AZI2	C1QB	CDK6	CCDC30	CCL5	SCGB3A1
DOCK4	MKI67	BCAR3	LRRK2	GPR183	SCGB3A1	HSPH1			ALOX15B	ALDH1A1		BACH2	C1QC	CEBPD	CCL18	CD2	SFTPC
DUSP4	MND1	BCL11A	LSP1	GRAMD1B	SDC4	IFITM3			ALOX5AP	ALDH1A2		BAG3	C5AR2	CENPE	CCL20	CD2AP	SLC2A1
ETS1	MS4A1	BCL2A1	LTB	HIP1	SEMA3C	IL1R2			AMIGO2	ALDH2		BAIAP2	C9orf16	CENPK	CCL5	CD3D	SLC8A1
EZH2	MYBL1	BCL2L11	MALT1	HIVEP1	SGPP1	IL7R			AMOTL1	ALK		BASP1	CABLES1	CEP78	CCSER1	CD3E	SPP1
FABP4	MYC	BCR	MCF2L2	HLA-DPA1	SH3PXD2A	INSIG1			AMPH	ALOX15B		BATF	CALM3	CHIT1	CD226	CD3G	TBC1D4
FAM102A	MYO1E	BEST1	MPZL3	HLA-DPB1	SPP1	INSR			ANGPTL4	ALOX5AP		BCAS2	CAVIN2	CHKA	CD28	CD6	THADA
FCHSD2	NAMPT	BHLHE41	MYC	HLA-DRB5	TACSTD2	KCNE1			ANK2	AMIGO2		BCAT1	CBLB	CHN2	CD3D	CD63	TIAM1
FN1	NDC80	BIRC3	NAMPT	HSPH1	TCF7L2	LIMA1			ANKRD22	AMPD3		BCL2	CCL18	CIR1	CD3E	CD69	TIMP1
GAB1	NFKBIA	BIRC5	NFKB1	ID2	TCTN3	LPL			ANKRD28	AMPH		BCL2A1	CCSER1	CKS2	CD3G	CD7	TMSB4X
GRN	PAG1	BMP6	NFKBIA	IFITM3	TPD52	LRRC23			ANLN	ANGPTL4		BCL2L11	CD14	CLIC3	CD69	CD70	TNFRSF13B
HERPUD1	PAX5	BNC2	NFKBID	IL21R	TTYH2	MALT1			ANOS1	ANK3		BCR	CD163	CLIP2	CD74	CD74	TNFRSF18
HIVEP1	PCNA	BRCA2	PAK1	IL7R	VIM	MAST4			ANXA1	ANKRD22		BIRC3	CD2AP	CNOT6L	CD83	CD83	TOX2
HLA-DPA1	PELI1	BSG	PDE3B	IQCN	ZBTB16	MED12L			ANXA2	ANKRD28		BLVRB	CD300E	COL1A2	CDC14A	CD84	TPPP3
HLA-DPB1	PTTG1	BTBD11	PELI1	JARID2		MGST3			AOC3	ANKRD55		BMP6	CD36	COL6A2	CEBPD	CD8A	VIM
HLA-DQB1	RAPGEF5	C10orf90	PKP2	KYNU		MSMO1			AP1B1	ANOS1		BORCS5	CD74	CRIP1	CEMIP2	CDC14A
HLA-DRA	RGS13	C12orf75	PMAIP1	LGALS2		MT1E			APBB2	ANXA1		BTBD11	CD79B	CRYBG1	CERS6	CDK6
HLA-DRB5	RIPOR2	C15orf48	PRKAR2B	LSP1		MT2A			APIP	ANXA2		C10orf90	CD80	CST7	CHAF1A	CEP128
HSP90AA1	RUBCNL	C1QA	RALA	MALT1		MYL6B			APLP1	AOC3		C15orf48	CD83	CXCL8	CHI3L1	CFD
IFI27	SAMD12	C1QB	RAPGEF2	MB21D2		NEBL			APOBEC3C	AP1B1		C1QA	CD86	CYP20A1	CHIT1	CHI3L1
INPP5A	SCGB1A1	C1QC	RAPH1	MERTK		NFE2L3			APOE	APBB2		C1QB	CD9	DENND4C	CHKA	CHIT1
IQCN	SCGB3A1	C5AR2	RGS1	MGLL		NLRP3			APOL2	APIP		C1QC	CDC14A	DENND5A	CHN2	CHKA
IRF8	SLC38A1	C9	RGS2	MPZL3		NR4A3			AQP3	APOBEC3A		C2	CDC42BPB	DNAH6	CIR1	CHN2
JADE3	SPP1	C9orf16	S100A10	NAV1		PAK1			AR	APOBEC3C		C5AR2	CEP128	DNAJB1	CITED2	CIR1
JUN	STMN1	CABLES1	SCGB1A1	NAV2		PALD1			AREG	APOC1		C9	CFD	DOCK11	CLEC2D	CKS2
KLHL14	TCL1A	CAMK1D	SCGB3A1	NET1		PDK4			ARHGAP10	APOE		CABLES1	CHCHD10	DOCK3	CLU	CLNK
KPNA2	TK1	CARD11	SFTPC	NFE2L3		PLEKHG2			ARHGAP31	APOL2		CALM3	CHN2	DOCK4	CMSS1	CLU
LARGE1	TMEM131L	CARMIL1	SGMS2	NFKB1		PMP22			ARHGAP32	AQP3		CBFA2T3	CHST15	DUSP6	CMTM8	CMC1
LMNA	TMSB4X	CASS4	SH3BP4	NFKBIA		PPARG			ARHGEF28	ARAP2		CCDC30	CITED2	DUT	CNOT6L	CMSS1
LSAMP	TPX2	CAVIN2	SLC1A3	NFKBID		PPBP			ARMC8	AREG		CCDC88A	CKB	ECE1	COL1A1	CNOT6L
LTB	YWHAH	CCL18	SLC2A1	NHSL1		PPP1R14A			ARRDC4	ARHGAP10		CCL18	CLEC4E	EFNA5	COL1A2	COL19A1
LY6E	ZNF608	CCL20	SLC2A3	NR4A1		PPP1R16B			ARSG	ARHGAP24		CCL4L2	CLIC2	EPAS1	CRIP1	COL1A1
MALT1		CCL3	SOD2	PCED1B		PRPS2			ARSI	ARHGAP31		CCND2	CLIC4	EPB41L5	CRYBG1	COL1A2
MAP4K4		CCL4	SPP1	PDK4		PTPRM			ASF1B	ARHGAP32		CCSER1	CMSS1	ETS1	CSGALNACT1	CRIM1
MAPRE2		CCL4L2	SQSTM1	PIK3CG		RAB13			ASPM	ARL4D		CD109	COL1A2	EZH2	CSTB	CRIP1
MARCKSL1		CCSER1	TACSTD2	PKP2		RNF144B			ASTL	ARMC8		CD14	COL6A2	FABP4	CTLA4	CRYBG1
MED12L		CD14	TCF4	PLEKHA5		S100A10			ATAD1	ARRDC4		CD163	CRADD	FARP2	CTSA	CSGALNACT1
MMP7		CD163	TNFSF8	PMAIP1		SCGB1A1			ATAD2	ARSG		CD22	CREB5	FCGR3A	CTSW	CST7
MRPS6		CD1A	TPPP3	PRKAR2B		SCGB3A1			ATF3	ASTL		CD2AP	CRIP1	FGFBP2	CXCL8	CTH
MYC		CD1B	TRAF1	RAMP1		SERPINB9			ATF6	ATAD1		CD300E	CRIP2	FN1	CYP20A1	CTSA
NAMPT		CD1E	VDR	RDX		SGMS2			ATP1B1	ATF3		CD36	CSF2RA	FNIP2	CYSLTR2	CTSW
NEDD9		CD207	VIM	RGS1		SH3RF3			ATP1B3	ATF6		CD63	CSGALNACT1	FOXO1	DAPK2	CXCL8
NFKB1		CD36	WDFY4	RUBCN		SLC1A3			ATP2B4	ATP1B3		CD74	CST3	FTL	DBI	CYP20A1
NOP10		CD70	XYLT1	SCGB1A1		SLC20A1			ATP2C1	ATP2B4		CD80	CSTA	FYN	DCN	DBI
NR4A3		CD74	YBX1	SCGB3A1		SMAD3			ATP6V0D2	ATP2C1		CD83	CSTB	GADD45A	DDHD1	DDIT3
OSBPL3		CD83	YWHAH	SERPINB9		SOX4			AURKA	ATP6V0D2		CD86	CTSB	GAS7	DDIT3	DDX58
PAK1		CD84	ZC3H12C	SLC1A3		SPAG4			AURKB	AURKB		CDCP1	CTTNBP2NL	GFOD1	DDX58	DNAJA1
PALD1		CD86		SLC41A2		SPP1			AVPI1	AUTS2		CDH23	CXCL2	GNG2	DHRS3	DOCK11
PCBP3		CD9		SLCO5A1		SPRED1			AXDND1	AVPI1		CEBPD	CXCL8	GNLY	DNAJA1	DOCK4
PDE3B		CDH20		SOD2		SPSB2			AXL	AZI2		CEMIP	CYSLTR2	GPR141	DNAJB1	DRAM1
PELI1		CDH23		SPP1		SRGAP1			AZI2	BAALC		CENPE	DAAM2	GZMA	DOCK4	DUSP16
PLIN2		CDK1		SRGAP1		SRGAP2B			B3GALNT2	BACH2		CENPW	DBI	GZMB	DPP4	DUSP4
POLB		CEBPD		SRGAP2B		STOM			BACH2	BAG3		CFD	DDHD1	HBA1	DUSP16	DUT
PPBP		CENPE		ST3GAL6		STRBP			BAG3	BAIAP2		CHI3L1	DENND4C	HERPUD1	DUSP4	EREG
PRSS3		CENPK		ST6GAL1		TCF4			BAIAP2	BANK1		CHIT1	DENND5A	HIVEP1	DUT	ETS1
RAB11FIP1		CENPU		ST6GALNAC3		TCOF1			BASP1	BASP1		CHN2	DNAJA1	HIVEP2	EDARADD	EZH2
RALA		CEP55		STAT4		TGM2			BCAR3	BATF		CHST15	DNAJB1	HLA-DPB1	EGR1	FABP4
RGS2		CERS4		TBC1D4		THBS1			BCL2	BCAR3		CIR1	DOCK4	HOPX	EMP1	FAM102A
RHEX		CHAF1A		TEX14		TIMP1			BCL2A1	BCAS2		CLCN3	DRAM1	HSH2D	ERO1B	FAM110B
RNASE6		CHCHD10		THBS1		TMEM51			BCL2L11	BCAT1		CLEC4E	DUSP16	HSPA1A	ETS1	FAM126A
RPS23		CHI3L1		TIAM1		TMSB4X			BEX1	BCL2		CLEC5A	DUSP6	HSPA5	ETV7	FAM160B1
RRP12		CHIT1		TNFSF8		TNFRSF13B			BEX3	BCL2A1		CLIC2	DUT	HSPB1	EZH2	FARP2
S100A8		CHKA		TRAF1		TNFSF8			BICDL1	BCL2L11		CLIP2	EBI3	HSPD1	FABP4	FLNB
SCGB1A1		CHN2		USP54		TPPP3			BIRC5	BCR		CLU	EEPD1	HSPH1	FAM102A	FN1
SCGB3A1		CIR1		UVRAG		TPST1			BLOC1S2	BEX1		CMSS1	EGR1	IER2	FAM214A	FOXO1
SDK2		CITED2		VIM		TREM1			BLVRB	BIRC3		COL1A1	EIF4A3	IFI27	FARP2	FTH1
SFTPC		CKS1B		WDR74		TUBA1A			BORCS5	BIRC5		COL1A2	EPB41L2	IGF1R	FBXO32	FTL
SH3PXD2A		CLEC10A		ZBTB16		VIM			BRAT1	BIRC7		COL23A1	EPN2	IGF2BP2	FCHSD2	G0S2
SH3RF3		CLEC11A		ZC3HAV1		WDR74			BRCA2	BLOC1S2		CREB5	EPS8	IGLL5	FN1	GALM
SLC27A4		CLEC4F				YBX1			BRI3	BLVRB		CREG1	EPSTI1	IKZF3	FOXO1	GAPDH
SLC2A3		CLEC5A				ZBTB16			BSG	BMP6		CRIP1	EREG	IL12RB2	FYN	GBP3
SNX9		CLIC4				ZFX			BTBD11	BNC2		CRISPLD2	ERN1	IL1R2	G0S2	GLCCI1
SPP1		CMSS1							BUB1B	BRCA2		CRYBG1	ETV3	IL32	GALM	GOLIM4
ST6GAL1		COL1A2							C10orf90	BRI3		CSGALNACT1	EZH2	IQCN	GAPDH	GPR141
TCF4		COL6A1							C15orf48	BSG		CST6	FABP4	IRAK2	GBP5	GPX3
TCL1A		COLEC12							C1QA	BTBD11		CTH	FAM110B	JUN	GNG2	GRN
TEX14		COMT							C1QB	BTG2		CTSB	FAM117B	KIR2DL4	GPX3	GZMA
THRB		CPM							C1QC	C10orf90		CTSK	FARP2	KIR3DL1	GRB10	GZMB
TMEM131L		CPVL							C5AR2	C16orf54		CTSL	FBP1	KLF12	GZMA	HERC5
TMSB4X		CRIP1							C8B	C16orf74		CTSZ	FCAR	KLRC1	HAUS2	HIP1
TNFSF8		CRIP2							C9	C1QA		CTTNBP2NL	FCGR3A	KLRD1	HERC5	HIVEP1
TOX		CRYBG1							C9orf16	C1QB		CXCL2	FCHO2	KLRG1	HERPUD1	HIVEP2
TPD52		CSF2RA							CA12	C1QC		CXCL8	FCHSD2	LAIR2	HIP1	HLA-DPA1
TPPP3		CSGALNACT1							CABLES1	C1QTNF1		CYTH3	FCN1	LAPTM4B	HIVEP1	HLA-DPB1
TRAF3IP3		CST3							CADM1	C2		DAAM2	FER	LDLR	HIVEP2	HLA-DQB1
TTC28		CST6							CADPS2	C5AR2		DBT	FGD2	LDLRAD4	HLA-DPA1	HMOX1
TUBA1A		CSTB							CALB1	C9		DDX60L	FGD4	LGALS1	HLA-DQA1	HOPX
TXLNB		CTSK							CALM3	C9orf16		DENND5A	FGFR1	LMNA	HLA-DQB1	HSP90AA1
TXN		CTSZ							CAMK1D	CA12		DNAJA1	FLVCR2	LRIG1	HLA-DRA	HSPA5
USP6NL		CXCL2							CAMK2D	CA2		DNAJB1	FMN1	LSAMP	HLA-DRB1	HSPB1
WDFY4		CXCL8							CAMP	CA8		DNASE2	FN1	LSP1	HLA-DRB5	IFI27
WDR74		CYTH3							CARD11	CABLES1		DOCK4	FNDC3A	MAPRE2	HMOX1	IFIT2
XYLT1		DAPP1							CASS4	CADPS2		DST	FOXK2	MFSD14B	HOPX	IFNG
YWHAH		DBI							CAVIN2	CALM3		DTL	FPR2	MLKL	HSP90AA1	IGLL5
ZBTB16		DDHD1							CAVIN3	CAMK1D		DUSP4	FTH1	MMP7	HSPA5	IL12RB2
ZNF331		DDIT3							CBLB	CAPG		DUT	FTL	MPP6	HSPB1	IL1R2
ZNF608		DENND5A							CCDC138	CARD11		EDA	FYN	MSR1	HSPG2	IL32
		DIAPH3							CCDC18	CARMIL1		EEPD1	G0S2	MTSS1	IFI27	IL7R
		DNAJA1							CCDC36	CASS4		EIF2AK3	GAB1	MYO1D	IFNG	INPP5A
		DNAJB1							CCDC83	CAVIN2		EPAS1	GAPDH	NAMPT	IGLL5	IQCN
		DNASE2B							CCDC88A	CAVIN3		EPN2	GAS7	NCALD	IKZF3	IRAK2
		DNMBP							CCL13	CBLB		EPS8	GBP1	NCKAP5L	IL12RB2	ISG15
		DOCK4							CCL18	CCDC181		EREG	GBP5	NFATC2	IL1B	ITM2C
		DRAM1							CCL2	CCDC30		ERN1	GK	NFKB1	IL1R2	JCHAIN
		DUSP16							CCL20	CCDC36		ERRFI1	GLIS3	NFKBIA	IL21R	JMY
		DUSP4							CCL21	CCDC80		ETV3	GLUL	NKG7	IL32	JUN
		DUSP6							CCL23	CCDC88A		F13A1	GNG2	NUPR1	IRAK2	KLF12
		DUT							CCL4	CCL13		FABP4	GRAMD2B	OFD1	ITK	KLRG1
		EBI3							CCL4L2	CCL18		FABP5	GTF2IRD1	PAK1	ITM2A	KPNA2
		EEPD1							CCL7	CCL2		FAM20C	HBEGF	PAM	JAML	KRT17
		EGR2							CCNA2	CCL20		FAM214A	HCK	PARP8	JMY	LAIR2
		EMP1							CCNB1	CCL22		FARP2	HIP1	PCSK5	KLRD1	LAPTM4B
		EMP2							CCNB2	CCL23		FCAR	HIVEP1	PDE4D	KLRG1	LDHB
		ENTPD7							CCSER1	CCL4		FCER1A	HIVEP2	PDK1	KRT17	LDLR
		EPSTI1							CD163	CCL4L2		FCGR3A	HLA-DPA1	PFKFB3	KSR1	LDLRAD4
		EREG							CD22	CCL5		FCHO2	HLA-DPB1	PLIN2	LAIR2	LGALS1
		ETV3							CD274	CCL7		FCHSD2	HLA-DQA1	POLB	LDHB	LIMA1
		EZH2							CD2AP	CCNA2		FCN1	HLA-DQB1	PON2	LDLR	LRIG1
		FABP5							CD300E	CCNB2		FER	HLA-DRA	PPBP	LDLRAD4	LSAMP
		FAM160A1							CD36	CCND1		FGD4	HLA-DRB1	PPP1R13B	LEF1	LSP1
		FBP1							CD59	CCSER1		FGF18	HS3ST3B1	PPP1R16B	LGALS1	LY6E
		FCER1A							CD63	CD14		FGFR1	HSP90AA1	PRDM1	LIMA1	MALT1
		FCGBP							CD7	CD163		FILIP1L	HSPA1A	PRF1	LMNA	MAML3
		FCN1							CD74	CD1A		FLNB	HSPA5	PRKX	LRIG1	MANF
		FGD2							CD80	CD1B		FLT1	HSPB1	PTPN22	LSAMP	MAPRE2
		FGF18							CD86	CD1E		FLVCR2	HSPD1	RAP1GAP2	LSP1	MARCKSL1
		FGL2							CD9	CD207		FMN1	HSPH1	RHOB	LTB	MCTP2
		FLNB							CDA	CD28		FMNL2	ID2	RHOC	LTC4S	MGST3
		FLT1							CDC20	CD300E		FN1	IFITM2	RHOH	LY6E	MLKL
		FLT3							CDC25C	CD36		FNDC3A	IFITM3	RIPOR2	MANF	MMP7
		FMN1							CDCA3	CD3D		FNIP2	IGF1R	S100A8	MAPRE2	MPP6
		FMNL2							CDCA5	CD59		FOLR3	IGF2BP2	S100A9	MATK	MT2A
		FN1							CDCA8	CD63		FOXK2	IGFBP6	SCGB1A1	MB21D2	MTSS1
		FNDC3A							CDCP1	CD69		FOXO1	IL10	SCGB3A1	MCTP2	MYC
		FNIP2							CDH23	CD7		FPR2	IL15	SERPINB9	MED12L	MYO1D
		FOXO1							CDK1	CD74		FRMD4A	IL18R1	SERPINE1	MFHAS1	NAMPT
		FPR2							CDK6	CD83		FTL	IL1B	SERPING1	MMP7	NCAM1
		FRY							CDKN2A	CD84		FYN	IL1R1	SFTPA1	MPP6	NCAM2
		FTH1							CDKN2C	CD9		G0S2	IL1R2	SFTPC	MRPS6	NFATC2
		FYN							CDKN3	CDA		GADD45B	INPP5A	SH2D1B	MT2A	NFKB1
		G0S2							CDT1	CDC14A		GAPDH	INSR	SKAP1	MYC	NFKBIA
		GADD45B							CEACAM8	CDC20		GAS7	IQCN	SLC27A4	MYL6B	NKG7
		GAS7							CEMIP	CDC42BPB		GBE1	IRAK2	SLC2A3	MYLIP	NR4A1
		GCLC							CENPA	CDCA3		GBP1	IRF8	SMAD3	MYO1D	NUPR1
		GCLM							CENPE	CDCP1		GCLM	ITGB8	SOD2	NAMPT	OASL
		GFOD1							CENPF	CDH23		GK	ITPKB	SORBS1	NCAPH	OSM
		GK							CENPM	CDK6		GLDC	JARID2	SPECC1	NDRG1	PAK1
		GLUD1							CENPO	CDKN2A		GLRX	JUN	SPON2	NFKB1	PAM
		GLUL							CENPU	CDKN3		GLT1D1	KCNMA1	SPP1	NFKBIA	PARP8
		GNG2							CENPW	CDT1		GLUL	KSR1	ST6GAL1	NLRP3	PCNA
		GNG4							CEP128	CEACAM8		GNG4	KYNU	SYTL3	NTRK2	PDE3B
		GNG7							CEP44	CEBPD		GPAT3	LGALS1	TANC2	NUPR1	PELI1
		GPAT3							CEP55	CEMIP		GPR137B	LGMN	TC2N	OASL	PFKFB3
		GPR183							CERS6	CENPK		GPRC5A	LILRB4	TEX14	OSBPL8	PHLDA1
		GPX3							CFAP161	CENPM		GRAMD1B	LRCH1	TFDP2	OSM	PHLDA2
		GRAMD2B							CFD	CENPP		GRAMD2B	LRRK2	THADA	PAG1	PIM2
		GRN							CHDH	CENPU		GRN	LSAMP	THBS1	PCSK1N	PLCG2
		GSN							CHI3L1	CENPW		GSN	LSP1	TMSB4X	PDE3B	PLEKHA5
		HCK							CHIT1	CEP128		GTF2IRD1	LTA4H	TNF	PDE4D	PLIN2
		HES4							CHKA	CEP44		HBEGF	LTB	TPPP3	PDE7B	PLPP1
		HIP1							CHN2	CEP55		HELB	LY6E	TPST1	PEBP1	POLB
		HIVEP1							CHRM3	CERS4		HES4	MAFB	TRAF3IP3	PELI1	POLE2
		HIVEP2							CHSY1	CERS6		HEY1	MALT1	TRERF1	PHTF1	PON2
		HK2							CIR1	CFAP161		HIP1	MAML3	TUBB	PLAC8	PPBP
		HLA-DMB							CIT	CFD		HIVEP1	MAP4K4	TXK	PLCG2	PPP1R13B
		HLA-DPA1							CKAP2L	CHCHD10		HIVEP2	MAPRE2	TXNDC11	PLIN2	PPP1R16B
		HLA-DPB1							CKS1B	CHCHD6		HK2	MARCKSL1	UAP1	PLPP1	PRKCA
		HLA-DQA1							CKS2	CHI3L1		HLA-DMB	MB21D2	UBASH3B	PON2	PRKX
		HLA-DQB1							CLCN3	CHIT1		HLA-DPA1	MCF2L2	USP37	PPA1	PTPRM
		HLA-DQB2							CLDN12	CHKA		HLA-DPB1	MCTP2	VIM	PPARG	RAB7A
		HLA-DRA							CLEC11A	CHN2		HLA-DQA1	MDM2	VIPR2	PPBP	RALA
		HLA-DRB1							CLEC17A	CHRM3		HLA-DQB1	MERTK	WDR74	PPP1R16B	RAP1GAP2
		HLA-DRB5							CLEC5A	CHST15		HLA-DRA	MET	WWOX	PPP2R2B	RASAL2
		HMGA1							CLIC2	CHSY1		HLA-DRB1	MGST3	XCL1	PRKCA	RHOH
		HMOX1							CLIC4	CIR1		HLA-DRB5	MNDA	XCL2	PSTPIP2	RIPOR2
		HOMER1							CLIP2	CITED2		HMGB2	MOB3B	YES1	PTPN22	RNLS
		HS3ST3B1							CLSPN	CKS1B		HMOX1	MPZL3	ZBTB16	RAB3IL1	RPS23
		HSD3B7							CLU	CKS2		HOMER1	MSMO1	ZEB1	RAPGEF5	RRAS2
		HSP90AA1							CMC1	CLCN3		HP	MSR1		RASAL2	S100A10
		HSP90B1							CMSS1	CLEC10A		HSP90AA1	MT2A		RCAN2	S100A8
		HSPA1A							COL1A1	CLEC11A		HSP90B1	NAMPT		RETREG1	S100A9
		HSPA5							COL1A2	CLEC1A		HSPA1A	NAV1		RGPD1	SAMD3
		HSPB1							COL4A2	CLEC4E		HSPD1	NCF1		RIPOR2	SCGB1A1
		HSPD1							COL6A2	CLEC5A		HSPG2	NDUFS3		RNF122	SCGB3A1
		HSPG2							COLEC12	CLIC2		HSPH1	NEBL		RPS23	SDF2L1
		HSPH1							COMT	CLIC4		HTRA1	NEDD9		RRAS2	SERPING1
		ID2							CORO2A	CLIP2		ID2	NEK1		S100A10	SERPINH1
		IDO1							CPE	CLNK		ID3	NFAM1		S100A11	SFTPA1
		IER3							CPM	CLSPN		IDH1	NFKB1		S100A8	SFTPA2
		IER5							CPVL	CLU		IER2	NFKBIA		S100A9	SFTPC
		IFI44L							CRADD	CMC1		IER5	NFKBID		SAMD3	SGCD
		IFITM2							CREG1	CMSS1		IFI44L	NOP10		SCGB1A1	SH2D1B
		IFITM3							CRIM1	CMTM8		IGF1R	NPHP4		SCGB3A1	SLC12A2
		IFNLR1							CRIP1	CNOT6L		IGSF6	NR4A3		SEC11C	SLC27A4
		IGLL5							CRIP2	COL19A1		IL10	OAS1		SERPING1	SLC2A1
		IGSF6							CRYBG1	COL1A1		IL18R1	OPN3		SERPINH1	SLC2A3
		IL10							CSF2RA	COL1A2		IL1RAP	OSBPL8		SFMBT1	SLC41A2
		IL18R1							CST3	COL23A1		IL1RL1	P2RY8		SFTPA1	SNTB1
		IL1B							CST6	COL4A2		IL7R	PAK1		SFTPA2	SNX9
		IL1R2							CSTA	COL6A1		INPP5A	PAM		SFTPC	SORBS1
		IL1RL1							CSTB	COL6A2		INSIG1	PAPSS2		SH3RF3	SPECC1
		IL6							CTAG2	COLEC12		INSR	PARP8		SIPA1L3	SPOCK2
		INPP5F							CTH	COMT		IQCN	PCSK5		SKAP1	SPON2
		INSR							CTNNAL1	CPM		IRF8	PDE3B		SLC22A23	SPP1
		IQCN							CTSB	CPVL		ITGB5	PDE4D		SLC27A4	STMN1
		IRAK2							CTSG	CRABP2		ITGB8	PDK1		SLC2A1	STRBP
		IRF8							CTSK	CRADD		ITPKB	PDK4		SLC2A3	STX3
		ISG15							CTSW	CREB5		JAML	PDLIM1		SNTB1	SYAP1
		ITGB8							CXADR	CRIP1		JARID2	PELI1		SNX9	SYTL3
		JAKMIP2							CXCL2	CRIP2		JMY	PFKFB3		SOD2	TAF4B
		JARID2							CXCL5	CRISPLD2		JUN	PID1		SOX5	TC2N
		KCNE1							CXCL8	CRYAB		KCNE1	PLA2G4A		SPARC	TCOF1
		KCNIP1							CYP20A1	CRYBG1		KCNMA1	PLAC8		SPP1	TCTN3
		KCNMA1							CYP27A1	CRYM		KDM2B	PLCG2		SPTBN1	TEC
		KIF16B							CYTH3	CSF1		KLRG1	PLEK		SRGAP2B	TESK2
		KIT							DBI	CSF2		KPNA2	PLEKHA5		SSBP3	TEX14
		KLRD1							DBT	CSF2RA		KYNU	PLIN2		STMN1	TFRC
		KLRG1							DCN	CSGALNACT1		LDLR	PLXNA2		STOM	THADA
		KNL1							DDHD1	CST3		LGALS1	PLXNC1		STRBP	THBS1
		KRT17							DDIT3	CST6		LGALS2	PPARG		STX3	THEMIS
		KSR1							DDX58	CSTA		LGMN	PPBP		SYTL2	TIMP1
		KYNU							DDX60L	CSTB		LILRB4	PPP1R13B		SYTL3	TLE1
		LDLRAD4							DEFB1	CTAG2		LIMA1	PPP1R16B		TANC2	TMEM184C
		LGALS1							DENND4C	CTH		LMNA	PRDM1		TBC1D4	TMSB4X
		LGALS2							DENND5A	CTSA		LRCH1	PRXL2A		TBC1D8	TNF
		LIMA1							DEPP1	CTSB		LRMP	PSAP		TBCEL	TNFRSF9
		LMNA							DGKH	CTSC		LRRK2	PSTPIP2		TC2N	TNIK
		LPAR1							DHRS3	CTSG		LSAMP	PTP4A3		TCOF1	TPPP3
		LPL							DHRS9	CTSK		LSP1	PTPRS		TCTN3	TPST1
		LRRK2							DHX34	CTSW		LTA4H	RAB11FIP1		TENT5C	TRAF3IP3
		LSP1							DIXDC1	CTSZ		LY6E	RAB3IL1		TESK2	TRERF1
		LTB							DLC1	CTTN		LYPD3	RALA		TEX14	TXNDC11
		LTC4S							DNAH2	CTTNBP2NL		LYVE1	RANBP2		THADA	UAP1
		LY6E							DNAJA1	CXADR		LYZ	RAPGEF2		THBS1	UBTD2
		LYPD3							DNAJB1	CXCL1		MALT1	RAPH1		TIAM1	UCK2
		LYZ							DNAJB4	CXCL13		MAP4K4	RDX		TIMP1	USP37
		MAFB							DNAJC5B	CXCL2		MB21D2	RFTN1		TMEM131L	VCAM1
		MALT1							DOCK11	CXCL5		MCEMP1	RFX2		TMSB4X	VIM
		MANF							DOCK3	CXCL8		ME1	RGL1		TNFRSF10D	WDR74
		MAP4K4							DOCK4	CXCL9		MEF2C	RGPD1		TNFRSF18	WWOX
		MAPRE2							DPF3	CYP1B1		MERTK	RHOB		TNFSF8	XCL1
		MARCKSL1							DPYS	CYP20A1		MET	RHOC		TOB1	XCL2
		MAST4							DRAM1	CYP27A1		MGST3	RIN2		TOX2	YES1
		MATK							DST	CYP7B1		MMP7	RIPOR2		TPPP3	YWHAH
		MB21D2							DTNA	CYSLTR2		MN1	RNF122		TRAF1	ZEB1
		MCF2L2							DUSP16	DAAM2		MNDA	RNF144B		TRAF3IP3	ZFX
		MGLL							DUSP4	DAB2		MOB1B	RNF19B		TRERF1	ZNF10
		MGST1							DUSP6	DACH1		MOB3B	RPS23		TSHZ2
		MIS18BP1							DUT	DAPP1		MRC1	RRP12		TSPO
		MKI67							E2F8	DBF4B		MRPS6	RUBCN		TTC39B
		MOB3B							EDA	DBI		MS4A4A	S100A10		TUBA1A
		MRC1							EEPD1	DBT		MSMO1	S100A11		TUBB
		MRPS6							EGR1	DCN		MSR1	S100A9		TXK
		MS4A4A							EGR2	DDX58		MT1X	SASH1		UBASH3B
		MSMO1							EIF2AK3	DDX60L		MT2A	SCGB1A1		UBTD2
		MSR1							ELOVL7	DEFB1		MTSS1	SCGB3A1		USP37
		MT1E							EMP1	DENND4C		MYC	SDC2		USP53
		MT1G							ENOX1	DENND5A		MYL6B	SDC4		UVRAG
		MT2A							ENPP3	DEPP1		MYO1D	SERPINA1		VCAM1
		MX1							EPAS1	DGKH		MYO1E	SESN2		VIM
		MYC							EPB41L1	DHRS3		MYOF	SGMS2		WDR59
		NARS2							EPB41L2	DHRS9		NARS2	SGPP1		YBX1
		NAV1							EPB41L4A	DHX34		NAV1	SH2D1B		YES1
		NCALD							EPB41L5	DIP2C		NCALD	SH3BP4		YWHAH
		NDC80							EPN2	DNAAF1		NDUFS3	SH3PXD2A		ZBTB16
		NDRG1							EPSTI1	DNAH5		NEBL	SH3PXD2B		ZBTB44
		NDUFS3							EREG	DNAH6		NEDD9	SH3RF3		ZC3HAV1
		NEDD9							ERO1B	DNAJA1		NEK1	SIPA1L3		ZEB1
		NEK1							ERRFI1	DNAJA4		NFAM1	SLAMF1		ZFX
		NET1							ETV3	DNAJB1		NFE2L3	SLAMF7		ZNRF1
		NFE2L3							ETV7	DNAJC5B		NFKB1	SLC10A1
		NFKB1							EXT1	DNASE2B		NFKBIA	SLC16A10
		NFKBIA							EZH2	DNM1		NFKBID	SLC20A1
		NFKBID							FABP3	DOCK11		NID1	SLC7A11
		NHSL1							FABP4	DOCK4		NKG7	SLC8A1
		NKD1							FABP5	DOK7		NLRP3	SMAD3
		NKG7							FADS1	DOP1B		NR4A3	SMPDL3A
		NLRP3							FADS2	DPYSL3		NRP1	SNTB1
		NMB							FAM110B	DRAM1		NUPR1	SNX10
		NPHP4							FAM111B	DST		OSBPL8	SNX9
		NR4A1							FAM117B	DTNA		OSM	SOD2
		NR4A3							FAM13A	DTYMK		OTUD1	SOX4
		NRP1							FAM168A	DUSP16		P3H2	SPARC
		NUF2							FAM20C	DUSP4		PADI2	SPOCK1
		OAS1							FAM3B	DUSP6		PADI4	SPP1
		OSBPL3							FAM89A	DUT		PAK1	SQSTM1
		OSBPL8							FARP1	DYSF		PAM	SRGAP2B
		OSM							FARP2	E2F1		PAPSS2	SSBP3
		OTUD1							FBLIM1	EBF1		PARP16	ST8SIA4
		P2RX7							FBN1	EBI3		PARP8	STARD13
		PADI2							FBP1	ECE1		PC	STAT4
		PAG1							FBXL2	EDA		PCBP3	STK38L
		PAK1							FCGR1A	EEPD1		PDE3B	STXBP2
		PALD1							FCGR2B	EGLN1		PDE4D	SULF2
		PAPOLG							FCGR3A	EGR1		PELI1	SYAP1
		PC							FCHSD2	EGR2		PFKFB3	SYTL3
		PDE3B							FCN1	EIF2AK3		PHLDA1	TANC2
		PDE7B							FDX1	ELANE		PHLDA2	TBC1D2
		PDK4							FER	ELOVL7		PKP2	TBC1D9
		PDLIM4							FGD2	EML6		PLAC8	TCF4
		PEBP1							FGD4	EMP1		PLCB1	TENT4B
		PELI1							FGD5	EMP2		PLCG2	TEX14
		PFKFB3							FGF10	ENPP2		PLD3	TFRC
		PID1							FGF18	ENTPD7		PLEK	THBS1
		PIM2							FGFR1	EPB41L1		PLEKHA5	TIMP1
		PKP2							FHIT	EPB41L2		PLEKHG1	TLR4
		PLBD1							FHL1	EPB41L5		PLIN2	TMEM184C
		PLEK							FLNB	EPHB1		PLPP3	TMEM232
		PLEKHA5							FMNL2	EPHX2		PLXNA2	TMEM51
		PLEKHG2							FN1	EPS8		PMAIP1	TMEM52B
		PLEKHO1							FNDC3A	EPSTI1		POLB	TMSB4X
		PLIN2							FNIP2	EREG		POLDIP3	TMX4
		PLXNA2							FOLR1	ERO1B		PPARG	TNFAIP6
		PLXNC1							FOLR3	ERRFI1		PPBP	TNFRSF21
		PMAIP1							FOXK2	ESCO2		PRDM1	TNIK
		POLB							FOXO1	ESR2		PSAP	TNNT1
		POLE2							FPR2	ETV3		PSME4	TOB1
		PON2							FRMD4A	EVL		PSTPIP2	TPPP3
		PPARG							FTH1	EXT1		PTGDS	TPST1
		PPBP							FTL	EZH2		PTPRS	TRAF1
		PPP1R16B							FUCA1	F11		RAB11FIP1	TREM1
		PPP2R2B							FXR2	F13A1		RAB13	TRERF1
		PRDM1							FYN	F3		RAB7A	TSC22D1
		PRKAR2B							G0S2	FABP3		RALA	TSPO
		PSAP							GADD45A	FABP4		RANBP2	TSPYL2
		PTGS2							GADD45B	FABP5		RAPH1	TTYH2
		PTMS							GALM	FADS2		RASAL2	TUBA1A
		PTPRS							GAPDH	FAIM		RASGRP3	UBASH3B
		PTTG1							GART	FAM110B		RFTN1	UGCG
		RAB11FIP1							GAS2L3	FAM111B		RFX2	USP36
		RAB3IL1							GAS7	FAM117B		RGPD1	USP37
		RALA							GATA3	FAM126A		RGS1	USP6NL
		RAMP1							GBE1	FAM13A		RGS13	UST
		RASAL2							GBP1	FAM160A1		RGS2	UVRAG
		RBP4							GBP3	FAM168A		RHOB	VAMP5
		RFX2							GBP5	FAM20C		RHOH	VAV2
		RGS13							GCH1	FAM3B		RIN2	VDR
		RGS2							GCLM	FAM89A		RIPOR2	VIM
		RHOB							GCNT2	FBP1		RNASE1	VSIG4
		RHOC							GDA	FBXO45		RNASE2	WDR59
		RHOH							GDF11	FCAR		RNF175	WDR74
		RIN2							GDF15	FCER1A		RPS23	XYLT1
		RNASE2							GEM	FCER2		RRP12	YBX1
		RNF144B							GFOD1	FCGR1A		RUBCN	YWHAH
		RNF19B							GGH	FCGR2B		RUNX3	ZBTB16
		RRP12							GINS2	FCGR3A		S100A10	ZBTB46
		RTN1							GIPC1	FCHO1		S100A9	ZC3H12C
		RUBCN							GK	FCHO2		S100B	ZFX
		RUBCNL							GLIS3	FCHSD2		SARNP	ZNF331
		RUNX2							GLT1D1	FCN1		SASH1	ZNRF1
		RUNX3							GLUD1	FDFT1		SCD
		S100A10							GLUL	FDX1		SCGB1A1
		S100A11							GM2A	FER		SCGB3A1
		S100A8							GNAI1	FGD2		SDC2
		S100A9							GNG11	FGD4		SDC4
		S100B							GOLIM4	FGD5		SECTM1
		SCGB1A1							GOLM1	FGF13		SERPINA1
		SCGB3A1							GPA33	FGF18		SERPINB5
		SDC2							GPAT3	FGFR1		SERPINB9
		SDC4							GPC4	FGL2		SERPING1
		SDF2L1							GPC5	FHIT		SFTPA1
		SECTM1							GPC6	FILIP1L		SFTPA2
		SEMA4A							GPR137B	FLNB		SFTPC
		SERPINB9							GPX3	FLT1		SGIP1
		SERPING1							GRIP2	FLT3		SGK1
		SFTPA1							GRK5	FLVCR2		SGMS2
		SFTPA2							GRN	FMN1		SGPP1
		SFTPC							GSTO2	FMNL2		SH3BP4
		SGK1							GTF2IRD1	FN1		SH3PXD2B
		SGMS2							GTSE1	FNDC3A		SIGLEC10
		SH3BP4							GYS1	FNIP2		SIPA1L3
		SH3PXD2B							HAUS6	FOLR1		SLAMF1
		SH3RF3							HBEGF	FOLR3		SLC16A10
		SIGLEC10							HECTD1	FOXK2		SLC16A6
		SIPA1L3							HERPUD1	FOXO1		SLC1A3
		SLAMF1							HES4	FRMD4A		SLC25A37
		SLC19A2							HEY1	FRY		SLC27A4
		SLC1A3							HIP1	FSTL3		SLC2A3
		SLC20A1							HIVEP1	FTH1		SLC31A1
		SLC27A4							HIVEP2	FTL		SLC7A11
		SLC2A1							HLA-DMB	FYN		SLC7A8
		SLC2A3							HLA-DPA1	G0S2		SMAD3
		SLC31A1							HLA-DPB1	GAB1		SMOX
		SLC7A11							HLA-DQB2	GADD45A		SMPDL3A
		SMAD3							HLA-DRA	GADD45B		SMPDL3B
		SMOX							HLA-DRB1	GAL		SNAPC1
		SNAP23							HLA-DRB5	GALM		SNTB1
		SNX9							HMG20B	GAPDH		SNX10
		SOD2							HMGA1	GART		SNX9
		SORT1							HMGB2	GAS2L3		SOD2
		SPDYA							HMGB3	GAS7		SPARC
		SPP1							HMGCS1	GBP1		SPATS2L
		SQSTM1							HMGN2	GBP3		SPON2
		SRGAP2B							HMMR	GBP5		SPP1
		ST6GAL1							HMOX1	GCH1		SPRY1
		ST6GALNAC3							HNF1A	GCHFR		SPSB1
		STARD13							HOMER1	GCLC		SQSTM1
		STAT4							HOMER2	GCLM		SRGAP1
		STK38L							HOXA3	GCNT2		SRGAP2B
		STMN1							HP	GDF11		SSBP2
		STRBP							HPGDS	GDF15		SSBP3
		STX3							HRH1	GEM		ST6GALNAC3
		SYNJ2							HS3ST3B1	GFOD1		ST8SIA4
		TACSTD2							HSD11B1	GGH		STARD13
		TANC2							HSF2BP	GINS2		STAT4
		TBC1D9							HSP90AA1	GIPC1		STK38L
		TCF4							HSP90B1	GJB2		STX3
		TENT4B							HSPA1A	GLDC		STXBP2
		TESK2							HSPA5	GLIS3		SULF2
		TGFBI							HSPB1	GLT1D1		SVIL
		THBS1							HSPD1	GLUD1		SYAP1
		TIAM1							HSPH1	GLUL		SYTL3
		TIMP1							HTRA4	GM2A		TBC1D2
		TMEM184C							ICA1	GNG2		TBC1D8
		TMEM51							ICOS	GNG4		TCF4
		TMEM52B							ID2	GNG7		TCF7L2
		TMSB4X							ID3	GOLIM4		TCOF1
		TMX4							IDH1	GOLM1		TCTN3
		TNFSF8							IDO1	GPAT3		TENT4B
		TOP2A							IER2	GPC4		TEX14
		TPD52							IER5	GPC5		TFPI
		TPPP3							IFI27	GPC6		TFRC
		TPST1							IFI44L	GPD1		TGFB2
		TPX2							IFITM2	GPR183		THBS1
		TRAF1							IFITM3	GPRC5A		THRB
		TREM1							IFNLR1	GPX3		TIAM1
		TREM2							IFRD1	GRAMD1B		TIMP1
		TSPAN15							IGFBP2	GRAMD2B		TJP2
		TSPO							IGFBP6	GRB10		TKTL1
		TYMS							IGLL5	GRIP2		TMSB4X
		UAP1							IGSF6	GRN		TMX4
		UBASH3B							IL12RB1	GSN		TNFAIP6
		UBE2C							IL15	GTF2IRD1		TNFRSF10D
		UGCG							IL17RB	GYS1		TNFRSF21
		USP37							IL18R1	GZMA		TNFSF8
		USP54							IL1R2	GZMB		TNNT1
		UST							IL1RN	HAMP		TPPP3
		VDR							IL6	HAUS2		TPST1
		VIM							IL7R	HAUS6		TRAF1
		VSIG4							INPP5A	HBB		TREM1
		WDR59							INSIG1	HCK		TRERF1
		WDR74							INTS6	HDAC9		TRIM69
		YBX1							IQCN	HEATR5B		TSC22D1
		YES1							IQGAP3	HECTD1		TSPYL2
		YWHAH							IRAK2	HERC5		TTYH2
		ZBTB16							IRF8	HERPUD1		TUBA1A
		ZBTB44							ITGAD	HES1		TUBB
		ZC3H12C							ITGB4	HES4		TWISTNB
		ZFYVE16							ITGB5	HEXB		TXNDC16
		ZNF704							JAKMIP2	HEY1		UBASH3B
		ZNRF1							JAML	HIP1		USP36
									JARID2	HIVEP1		USP37
									JCHAIN	HIVEP2		USP6NL
									JMY	HLA-DMB		UST
									JSRP1	HLA-DPA1		UVRAG
									JUN	HLA-DPB1		VAMP5
									KANK1	HLA-DQA1		VAV2
									KAZN	HLA-DQB1		VCAN
									KCNA2	HLA-DQB2		VIM
									KCNAB1	HLA-DRA		VSIG4
									KCNE1	HLA-DRB1		WDR59
									KCNJ2	HLA-DRB5		WDR74
									KCNMA1	HMG20B		WIPI2
									KDM2B	HMGA1		XYLT1
									KIF14	HMGB2		YES1
									KIF16B	HMGCS1		YWHAH
									KIF18B	HMGN2		ZBTB16
									KIF20A	HMMR		ZC3H12C
									KIF26B	HMOX1		ZFX
									KLHDC8B	HOXA3		ZFYVE16
									KLHL15	HP		ZNF10
									KLHL25	HPGDS		ZNF331
									KLHL29	HRH1		ZNRF1
									KLRD1	HRK
									KLRG1	HS3ST2
									KNL1	HS3ST3B1
									KPNA2	HSD11B1
									KRT17	HSD3B7
									KSR1	HSH2D
									KYNU	HSP90AA1
									LAMB1	HSP90B1
									LARGE1	HSPA1A
									LDLR	HSPB1
									LDLRAD4	HSPD1
									LGALS1	HSPG2
									LGALS3	HSPH1
									LGALS3BP	HTRA1
									LGMN	HTRA4
									LGR4	ICA1
									LILRB4	ID2
									LIMA1	ID3
									LINGO2	IDH1
									LMCD1	IDO1
									LMNA	IER3
									LONRF3	IER5
									LPAR1	IFI27
									LPAR3	IFI44L
									LPL	IFIT1
									LRIG1	IFIT2
									LRRC23	IFIT3
									LRRK2	IFITM2
									LSAMP	IFITM3
									LSP1	IFNLR1
									LTA4H	IFT122
									LY6E	IGF1R
									LYPD3	IGFBP2
									LYZ	IGFBP6
									MACC1	IGLL5
									MAD2L1	IGSF6
									MAEL	IKZF2
									MAFB	IKZF3
									MALT1	IL10
									MAML3	IL18R1
									MANF	IL1A
									MAP3K7CL	IL1B
									MAP4K4	IL1R1
									MARCKS	IL1R2
									MAST4	IL1RL1
									MATK	IL1RN
									MB21D2	IL6
									MCEMP1	IL7R
									MCF2L2	INPP5A
									MCM7	INPP5F
									MCTP2	INSIG1
									MDK	INSR
									MDM2	INTS6
									ME1	IQCN
									MELK	IQGAP3
									MFHAS1	IRAK2
									MFSD14B	IRF4
									MGAT3	IRF8
									MGLL	ISG15
									MGST1	ITGA6
									MGST3	ITGA7
									MITF	ITGB1BP1
									MKI67	ITGB3
									MLPH	ITGB5
									MME	ITGB8
									MMP10	ITM2C
									MMP2	JAKMIP2
									MMP7	JAML
									MMP9	JARID2
									MND1	JMY
									MNDA	JUN
									MOB3B	KAZN
									MPC2	KCNA2
									MRC1	KCNE1
									MRPS33	KCNJ15
									MRPS6	KCNJ2
									MS4A4A	KCNMA1
									MS4A5	KDM2B
									MSMO1	KEL
									MSR1	KHDRBS3
									MT1G	KIF16B
									MT2A	KIF18A
									MTBP	KIF26B
									MTUS2	KLHL25
									MX1	KLHL6
									MXD3	KLK4
									MYC	KLRD1
									MYL6B	KLRG1
									MYL9	KPNA2
									MYLIP	KRT17
									MYO1D	KRT5
									MYO1E	KSR1
									MYO6	KYNU
									NAALAD2	LARGE1
									NAF1	LDHC
									NARS2	LDLR
									NAV1	LDLRAD4
									NCALD	LGALS1
									NCAPH	LGALS2
									NCEH1	LGALS3
									NDC80	LGALS3BP
									NDRG1	LGMN
									NDUFS3	LIF
									NEK1	LILRB4
									NEK2	LIMA1
									NELFCD	LINGO2
									NET1	LMCD1
									NFAM1	LMNA
									NFATC2	LPL
									NFE2L3	LRCH1
									NFKB1	LRMP
									NFKBIA	LRPAP1
									NLRP3	LRRC23
									NNMT	LRRK2
									NOP10	LSAMP
									NPHS1	LSP1
									NR4A3	LTA4H
									NRIP1	LTB
									NRP1	LTC4S
									NRP2	LY6E
									NRXN3	LYPD3
									NUF2	LYZ
									NUPR1	LZTS1
									NUSAP1	MACC1
									OAS1	MAD2L1
									OASL	MAFB
									OPRK1	MALT1
									OSBPL10	MAML3
									OSBPL11	MANF
									OSBPL1A	MAP3K13
									OSBPL3	MAP4K4
									OSBPL8	MAPRE2
									OSM	MARCKS
									OTUD1	MATK
									P2RX1	MB21D2
									P2RX7	MCEMP1
									PADI2	MCF2L2
									PAK1	MCTP2
									PALLD	MDK
									PAPLN	MED12L
									PAPSS2	MEF2C
									PAQR5	MERTK
									PARP8	MET
									PC	METTL7B
									PCBP3	MFHAS1
									PCNA	MGAM
									PCSK5	MGLL
									PDE3B	MGST1
									PDE7B	MGST3
									PDGFC	MIS18BP1
									PDK1	MITF
									PDK4	MKI67
									PDLIM1	MLKL
									PDLIM4	MLPH
									PEBP1	MME
									PEBP4	MMP1
									PELI1	MMP10
									PFKFB3	MMP12
									PHGDH	MMP2
									PHLDA1	MMP7
									PHLDA3	MMP9
									PHLDB2	MN1
									PHTF1	MND1
									PID1	MNDA
									PIK3R3	MOB3B
									PIM2	MPC2
									PIMREG	MPP6
									PKD2L1	MPZL3
									PKP2	MRC1
									PLA2G4A	MREG
									PLA2G7	MRPS33
									PLAC8	MRPS6
									PLAC9	MS4A4A
									PLBD1	MS4A5
									PLCG2	MSLN
									PLD3	MSMO1
									PLEKHG2	MSR1
									PLIN2	MT1E
									PLK1	MT1F
									PLPP1	MT1G
									PLPP3	MT1H
									PLSCR2	MT1M
									PLTP	MT1X
									PLXNA2	MT2A
									PMAIP1	MTO1
									PMP2	MTSS1
									PMP22	MUCL1
									POLB	MX1
									POLG2	MYB
									PON2	MYC
									POSTN	MYL6B
									PPARG	MYL9
									PPBP	MYLIP
									PPIC	MYO1D
									PPP1R13B	MYO1E
									PPP1R16B	MYOF
									PPP2R3A	NAALAD2
									PRAG1	NAMPT
									PRC1	NARS2
									PRDX1	NAV1
									PRDX4	NAV2
									PRIMPOL	NCALD
									PRMT9	NCAM1
									PROCR	NCAPH
									PRPS2	NCEH1
									PRR11	NCF1
									PRXL2A	NCKAP5
									PSD3	NCKAP5L
									PSME4	NCS1
									PTGDS	NDP
									PTGS2	NDRG1
									PTMS	NDUFS3
									PTPN13	NEBL
									PTPRM	NEDD4L
									PTPRS	NEFL
									PTTG1	NEK1
									PTX3	NELFCD
									PUS10	NELL2
									PVR	NET1
									RAB11FIP1	NFAM1
									RAB3A	NFE2L3
									RAB7A	NFIA
									RAB7B	NFKB1
									RAD51	NFKBIA
									RAD51AP1	NFKBID
									RALA	NHSL1
									RANBP2	NID1
									RAPGEF2	NKG7
									RAPH1	NKX3-1
									RASAL2	NLRP3
									RASGRP3	NMB
									RASSF8	NNMT
									RBP4	NOP10
									RDX	NPAS2
									REEP3	NR1H3
									RETN	NR4A1
									RETREG1	NR4A3
									RFX2	NRIP1
									RGPD1	NRP1
									RGS1	NRXN3
									RGS12	NUPR1
									RGS13	OAS1
									RHCG	OFD1
									RHOB	OPN3
									RHOC	ORAI1
									RHOH	OSBPL10
									RIN2	OSBPL1A
									RIPOR2	OSBPL3
									RMDN3	OSBPL8
									RNASE1	OSM
									RNASE2	OTUD1
									RNASE6	P2RX7
									RND3	P2RY14
									RNF144B	P2RY8
									RNF175	P3H2
									ROCK2	P4HA1
									RPS23	PADI2
									RRM2	PAK1
									RRP12	PALD1
									RSPO3	PALLD
									RUBCN	PAM
									RUVBL2	PAPLN
									RYR2	PAPOLG
									S100A10	PAPSS2
									S100A11	PAQR5
									S100A13	PARP8
									S100A16	PC
									S100A8	PCBP3
									S100A9	PCDH9
									S100B	PCED1B
									S100P	PCNA
									SAMD12	PCSK1N
									SAMD3	PCSK5
									SAMD4A	PDE3B
									SARNP	PDE4D
									SASH1	PDGFC
									SCCPDH	PDK1
									SCD	PDK4
									SCGB1A1	PDLIM1
									SCGB3A1	PDLIM4
									SDC2	PEBP1
									SDC4	PELI1
									SEC11C	PFAS
									SECTM1	PFKFB3
									SEMA3C	PGAP1
									SEMA4A	PGM1
									SERPINA1	PHGDH
									SERPINB5	PHLDA3
									SERPINB9	PHTF1
									SERPINF1	PID1
									SERPING1	PIF1
									SFTPA1	PIK3CG
									SFTPA2	PIK3R3
									SFTPC	PIM2
									SGK1	PIMREG
									SGMS2	PKP2
									SGPP1	PLA2G7
									SH3BP4	PLAC9
									SH3PXD2A	PLAU
									SH3PXD2B	PLBD1
									SH3RF3	PLCB1
									SHCBP1	PLCG2
									SHROOM3	PLEKHA5
									SIGLEC10	PLEKHG2
									SIK2	PLEKHO1
									SIPA1L3	PLIN2
									SKAP1	PLOD2
									SLA2	PLPP3
									SLC16A10	PLTP
									SLC16A6	PLXNC1
									SLC19A3	PMAIP1
									SLC1A3	POLB
									SLC20A1	POLG2
									SLC25A18	PON2
									SLC25A44	POSTN
									SLC27A4	PPA1
									SLC2A1	PPARG
									SLC2A3	PPBP
									SLC31A1	PPIC
									SLC47A1	PPP1R13B
									SLC48A1	PPP1R14C
									SLC7A11	PPP1R16B
									SLC8A2	PPP2R2B
									SLC9A7	PPP2R3A
									SMAD3	PRAG1
									SMC2	PRDM1
									SMOX	PRDX1
									SMPDL3B	PRDX4
									SNAP23	PRIMPOL
									SNAPC1	PRKAR2B
									SNED1	PRKCA
									SNRNP25	PRKCG
									SNTB1	PRKX
									SNX2	PRMT9
									SNX9	PROC
									SOD2	PROCR
									SORBS1	PRPS2
									SORT1	PRPSAP2
									SPARC	PRR16
									SPATS2L	PRSS21
									SPC24	PRSS3
									SPC25	PRXL2A
									SPDYA	PSAT1
									SPOCD1	PSD3
									SPP1	PSME4
									SPSB1	PSTPIP2
									SPSB2	PTGDS
									SPTBN4	PTGS2
									SPTLC3	PTMS
									SRGAP1	PTPN22
									SRGAP2B	PTPRS
									SRSF12	PTX3
									SSBP3	PUS10
									ST3GAL6	PVALB
									ST6GALNAC3	QRICH2
									STAC	RAB11FIP1
									STARD13	RAB13
									STAT4	RAB3IL1
									STK38L	RAB7B
									STMN1	RAD51AP1
									STOM	RALA
									STON1	RALGPS2
									STON2	RAMP1
									STRBP	RANBP2
									STX3	RAP1GAP2
									STXBP2	RAPGEF2
									SUGCT	RAPH1
									SV2B	RASAL2
									SVIL	RASGRP3
									SYAP1	RBFOX3
									SYCP2L	RBP4
									SYNGR1	RDX
									SYNJ2	RECK
									SYTL3	REEP3
									TACSTD2	RETN
									TANC2	RETREG1
									TBC1D2	RFX2
									TBC1D4	RGL1
									TBC1D8	RGPD1
									TBC1D9	RGS13
									TBX20	RGS16
									TCF19	RGS2
									TCF7L2	RGS20
									TDRD3	RHCG
									TEC	RHOB
									TENM4	RHOC
									TENT4B	RHOH
									TENT5A	RIN2
									TESK2	RIPOR2
									TEX14	RMDN3
									TFCP2L1	RMND1
									TFDP2	RNASE2
									TFF2	RNASE6
									TFRC	RND3
									TGFBI	RNF125
									TGM2	RNF144B
									THBD	RNF175
									THBS1	RNF19B
									THRB	RNLS
									TIAM1	RRM2
									TIMP1	RRP12
									TIMP3	RSAD2
									TJP1	RTN1
									TJP2	RUBCNL
									TK1	RUNX2
									TKTL1	RUNX3
									TMEM106C	RUVBL2
									TMEM131L	RYR2
									TMEM176A	S100A10
									TMEM176B	S100A11
									TMEM184C	S100A13
									TMEM51	S100A16
									TMEM52B	S100A8
									TMSB4X	S100B
									TMTC2	S100P
									TMX4	SAMD4A
									TNF	SARNP
									TNFAIP6	SASH1
									TNFRSF10D	SCARB1
									TNFRSF21	SCCPDH
									TNIK	SCG5
									TNNI2	SCGB1A1
									TNNT1	SCGB3A1
									TNS3	SCIN
									TOB1	SDC2
									TOP2A	SDC4
									TPD52	SDF2L1
									TPPP3	SDK1
									TPST1	SEC11C
									TPX2	SECTM1
									TREM2	SEL1L3
									TRHDE	SEMA3C
									TROAP	SEMA4A
									TSPO	SERPINA1
									TSPYL2	SERPINB10
									TTC39B	SERPINB2
									TUBA1A	SERPINB5
									TUBB	SERPINB9
									TULP2	SERPINE1
									TVP23A	SERPING1
									TXN	SERPINH1
									TXNDC11	SESN2
									UAP1	SFTPA1
									UBASH3B	SFTPA2
									UBE2C	SFTPC
									UBE2T	SGCD
									UBTD2	SGIP1
									UCHL1	SGK1
									UGCG	SGMS2
									USP36	SH3BP4
									USP37	SH3PXD2A
									USP54	SH3RF3
									USP6NL	SHOX2
									UST	SHROOM3
									VAMP5	SIGLEC10
									VAV2	SIPA1L3
									VCAM1	SLAMF1
									VCAN	SLC10A1
									VCL	SLC12A8
									VDR	SLC16A1
									VGLL3	SLC16A10
									VIL1	SLC19A2
									VIM	SLC1A3
									VSIG4	SLC20A1
									WDFY4	SLC25A37
									WDR59	SLC27A4
									WDR74	SLC2A3
									WWOX	SLC31A1
									YBX1	SLC38A1
									YES1	SLC41A2
									YWHAH	SLC7A11
									ZBTB16	SLC7A8
									ZBTB2	SLC8A1
									ZBTB44	SLC8A2
									ZBTB46	SLC9A1
									ZBTB7C	SLCO5A1
									ZC3H12C	SMAD3
									ZFX	SMC2
									ZFYVE16	SMOX
									ZNF10	SMPDL3A
									ZNF331	SNAI1
									ZNF804A	SNAP23
									ZNF891	SNAPC1
									ZNRF1	SNRNP25
									ZWINT	SNX10
										SNX2
										SNX9
										SOD2
										SORT1
										SPARC
										SPATS2L
										SPC24
										SPC25
										SPECC1
										SPOCD1
										SPON2
										SPP1
										SPRED1
										SPSB2
										SPTBN1
										SQSTM1
										SRGAP1
										SRGAP2B
										SRSF12
										SSBP2
										SSBP3
										ST3GAL6
										ST6GAL1
										ST6GALNAC3
										ST8SIA4
										STAC
										STARD13
										STAT4
										STEAP1
										STK38L
										STMN1
										STRBP
										STX3
										STXBP2
										SUGCT
										SULF2
										SULT1C2
										SV2B
										SVIL
										SYAP1
										SYCP2L
										TACSTD2
										TAF4B
										TANC2
										TATDN1
										TBC1D4
										TBC1D8
										TBC1D9
										TBX20
										TCEAL9
										TCF4
										TCF7L2
										TCOF1
										TCTN3
										TDO2
										TDRD3
										TDRD6
										TEC
										TENM4
										TENT4B
										TENT5A
										TEX14
										TFCP2L1
										TFDP2
										TFPI
										TFRC
										TGFBI
										TGM2
										THADA
										THBD
										THBS1
										THRB
										TIAM1
										TIMP1
										TIMP3
										TINAGL1
										TJP1
										TJP2
										TK1
										TKTL1
										TLR4
										TMC5
										TMEM106C
										TMEM131L
										TMEM176A
										TMEM184C
										TMEM51
										TMSB4X
										TMX4
										TNFAIP6
										TNFRSF10B
										TNFRSF10D
										TNFRSF18
										TNFRSF21
										TNFRSF8
										TNFSF10
										TNFSF14
										TNFSF8
										TNIP3
										TNNI2
										TNNT1
										TNS3
										TOB1
										TOMM40
										TPM2
										TPPP3
										TPST1
										TRAF1
										TREM1
										TREM2
										TRERF1
										TRIM69
										TRIM72
										TSPAN15
										TSPAN4
										TSPO
										TSPYL2
										TTC28
										TTC39B
										TTYH2
										TUBA1A
										TUBB
										TULP2
										TXN
										TXNDC11
										TXNDC5
										UAP1
										UBASH3B
										UBE2C
										UBE2T
										UCHL1
										UCK2
										USP13
										USP2
										USP36
										USP37
										USP53
										USP6NL
										USPL1
										UST
										UTP6
										VAMP5
										VAT1
										VAV2
										VAX2
										VCAN
										VCL
										VIM
										VSNL1
										WDFY4
										WDR59
										WDR66
										WDR74
										WWOX
										XYLT1
										YBX1
										YES1
										YWHAH
										ZBTB16
										ZBTB44
										ZBTB46
										ZBTB7C
										ZC3H12C
										ZC3HAV1
										ZFAND2A
										ZFX
										ZFY
										ZFYVE16
										ZNF10
										ZNF331
										ZNF804A
										ZNRF1
										ZWINT
